# Supplementary material for: A risk assessment methodology to evaluate the risk failure ofManaged Aquifer Recharge in Mediterranean basin
Source: Copernicus journal article supplement (doi:10.5194/hess-2018-8), 2018-01-16
Supplement: Supplementary file 1 [file hess-2018-8-supplement.pdf]

## **S1. LITERARURE REVIEW OF MANAGED AQUIFER RECHARGE FAILURES**

| CASE                                                                                | RECHARGE TYPE                          | PLACE & TIME                    | DURATION OF THE PROJECT            | MAIN PROBLEMS                                                                                                                                                                                                                                                                                                                                                                                                                              | REFERENCE      |
|-------------------------------------------------------------------------------------|----------------------------------------|---------------------------------|------------------------------------|--------------------------------------------------------------------------------------------------------------------------------------------------------------------------------------------------------------------------------------------------------------------------------------------------------------------------------------------------------------------------------------------------------------------------------------------|----------------|
| WATER FACTORY 21, COASTAL BARRIER SEAWATER INTRUSION                                | DEEP WELLS                             | ORANGE COUNTY (USA), 1977       | 4 YEARS                            | PROBLEMS - MICROBIOLOGICAL, METEOROLOGICAL (EXCESS OF RAIN DIMINISHES THE AMOUNT OF WATER INJECTED), DESIGN AND CONSTRUCTION COSTS (16 MILLION \$), OPERATION COSTS (2 MILLION \$ A YEAR), CLOGGING, WASTEWATER TREATMENT PLANT FAILURE, SALINITY/SODICITY (WATER INTRUSION), GEOLOGICAL HETEROGENEICITY (DIFFERENT GEOLOGICAL MATERIAL LAYERS PRESENT), NOT SHALLOW AQUIFER OR HIGH THICKNESS (THE WELLS ARE REALLY DEEP 850 - 1150 FEET) | (ASANO, 1985)  |
| OPERATIONS AT THE CEDAR CREEK WASTEWATER RECLAMATION-RECHARGE FACILITIES            | DEEP WELLS                             | NASSAU COUNTY, NEW YORK, (1979) | 3 YEARS (4 INCLUDING CONSTRUCTION) | PROBLEMS - DESIGN AND CONSTRUCTION COSTS (22 MILLION DOLLARS), CIVIL WORK FAILURES "VERY LIKELY" (OTHERS - UNDERDRAIN SYSTEMS, DUAL-MEDIA FILTER SYSTEM, CARBON ADSORBERS, MECHANICAL/ELECTRONIC PROBLEMS), OPERATIONAL COSTS (8 MILLION DOLLARS), WASTEWATER TREATMENT PLANT FAILURE                                                                                                                                                      | (ASANO, 1985)  |
| PROPOSED GROUNDWATER RECHARGE                                                       | DEEP WELLS                             | EL PASO, TEXAS (1985)           | UNKNOWN                            | PROBLEMS - CONSTRUCTION COST (OVER 22 MILLION DOLLARS), NUTRIENTS (NITROGEN AND PHOSPHORUS), SALINITY AND SODICITY, WASTEWATER TREATMENT PLANT FAILURE, SUSPENDED SOLIDS, GAS GENERATION (PHYSICAL MOTIVES AND BAD DESIGN)                                                                                                                                                                                                                 | (ASANO, 1985)  |
| GROUNDWATER RECHARGE FOR WASTEWATER REUSE IN THE DAN REGION PROJECT                 | INFILTRATION BASINS / SPREADING BASINS | ISRAEL, (1977)                  | 5 YEARS                            | PROBLEMS - LAND USE (30 HA), LOW INFILTRATION RATES, CLIMATIC CONDITIONS, AND THE FREQUENCY OF BASIN CLEANING, SALINITY, NUTRIENTS (N AND P HIGHER IN WINTER), SUSPENDED SOLIDS (HIGHER IN WINTER), ORGANIC CHEMICAL COMPOUNDS, WASTEWATER TREATMENT PLANT FAILURE, GEOLOGICAL HETEROGENEICITY (DIFFERENT GEOLOGICAL MATERIAL LAYERS PRESENT), TRACE ELEMENTS (MAINLY METALS, BUT ALSO MANGANESE AND POTASSIUM)                            | (ASANO, 1985)  |
| SOIL DEPOSITION OF TRACE METALS DURING GROUNDWATER RECHARGE USING SURFACE SPREADING | SURFACE SPREADING                      | CALIFORNIA (USA)                | 20 YEARS                           | PROBLEMS - SALINITY AND SODICITY, SUSPENDED SOLIDS, TRACE ELEMENTS (OTHERS BUT MAINLY METALS), CLOGGING (NOT SPECIFIED), ORGANIC CHEMICALS, WATER SCARCITY (CLIMATE)                                                                                                                                                                                                                                                                       | (ASANO, 1985)  |
| ISSUES IN ARTIFICIAL RECHARGE                                                       | GENERAL                                | NA                              | NA                                 | PROBLEMS - LONG TIME, CHEMICAL QUALITY ISSUES<br>NOT A PROBLEM – HAS GOOD SOCIAL ACCEPTANCE                                                                                                                                                                                                                                                                                                                                                | (BOUWER, 1996) |

| CASE                                                             | RECHARGE TYPE               | PLACE & TIME | DURATION OF THE PROJECT | MAIN PROBLEMS                                                                                                                                                                                                                                                                                                                   | REFERENCE        |
|------------------------------------------------------------------|-----------------------------|--------------|-------------------------|---------------------------------------------------------------------------------------------------------------------------------------------------------------------------------------------------------------------------------------------------------------------------------------------------------------------------------|------------------|
| ISSUES IN ARTIFICIAL RECHARGE                                    | INFILTRATION BASINS         | NA           | NA                      | PROBLEMS – LAND USE, WATER QUALITY, CLOGGING, SUSPENDED SOLIDS CONTENT, ORGANIC COMPOUNDS, FLOODING, DRYING, NUTRIENTS (NITROGEN MAINLY), BAD SOIL INFILTRATION RATE AND COMPACTION                                                                                                                                             | (BOUWER , 1996)  |
| ISSUES IN ARTIFICIAL RECHARGE                                    | DEEP WELLS                  | NA           | NA                      | PROBLEMS – MAIN PROBLEM IS CLOGGING, SUSPENDED SOLIDS, MICROORGANISMS, NUTRIENTS (N AND P), DESIGN AND CONSTRUCTION COSTS, CORROSION<br><br>NOT A PROBLEM – CAN BE DONE IN ZONES WHERE PERMEABLE SOILS ARE NOT AVAILABLE                                                                                                        | (BOUWER , 1996)  |
| ISSUES IN ARTIFICIAL RECHARGE                                    | VADOSE ZONE WELLS           | NA           | NA                      | PROBLEMS – CLOGGING, SUSPENDED SOLIDS, NUTRIENTS, MICROORGANISMS, ORGANIC COMPOUNDS, LOW INFILTRATION RATES<br><br>NOT A PROBLEM - CHEAPER                                                                                                                                                                                      | (BOUWER , 1996)  |
| ISSUES IN ARTIFICIAL RECHARGE                                    | SEEPAGE TRENCHES            | NA           | NA                      | PROBLEMS – SUSPENDED SOLIDS ARE USUALLY A PROBLEM,<br><br>NOT A PROBLEM - CHEAPER                                                                                                                                                                                                                                               | (BOUWER , 1996)  |
| ARTIFICIAL RECHARGE OF GROUNDWATER: HYDROGEOLOGY AND ENGINEERING | SURFACE INFILTRATION        | NA           | NA                      | PROBLEMS – FLOOD DANGER, CIVIL WORK FAILURES (OTHERS AND SLOPE), LAND USE, WATER QUALITY PROBLEMS, SUSPENDED SOLIDS, CLOGGING (BIOLOGICAL, MINERAL AND SEDIMENTAL), GAS FORMATION (BACTERIAL MAINLY BUT OTHER TYPES ARE ALSO QUITE TYPICAL), NUTRIENTS, ORGANIC COMPOUNDS, RISK OF LOW INFILTRATION RATE, CONTAMINANT SPREADING | (BOUWER , 2002A) |
| ARTIFICIAL RECHARGE OF GROUNDWATER: HYDROGEOLOGY AND ENGINEERING | VADOSE-ZONE INFILTRATION    | NA           | NA                      | PROBLEMS – VERY LIKELY RISK OF INSUFFICIENT SOIL INFILTRATION RATE, LAND USE, PIPELINE FAILURE, GAS ACCUMULATION (PHYSICAL), PIPE FAILURE, MAINLY DISADVANTAGE IS CLOGGING (BIOLOGICAL AND SEDIMENTAL), SUSPENDED SOLIDS CONTENT,<br><br>NOT PROBLEM - CHEAPER                                                                  | (BOUWER , 2002A) |
| ARTIFICIAL RECHARGE OF GROUNDWATER: HYDROGEOLOGY AND ENGINEERING | WELLS                       | NA           | NA                      | PROBLEMS – COMPACTION, CLOGGING (MOST TYPICALLY PROBLEM, DUE TO SEDIMENTS BUT ALSO OTHER REASONS LIKE BACTERIA OR PRECIPITATION), WATER QUALITY, NUTRIENTS, SALINITY, MICROBIOLOGICAL PROBLEMS,<br><br>NOT PROBLEM – LAND USE, INFILTRATION RATE                                                                                | (BOUWER , 2002A) |
| ARTIFICIAL RECHARGE OF GROUNDWATER: HYDROGEOLOGY AND ENGINEERING | GENERAL ARTIFICIAL RECHARGE | NA           | NA                      | THE MAIN ISSUE IN ARTIFICIAL RECHARGE IS CLOGGING, AVAILABILITY OF WATER RESOURCES IS ALSO A PROBLEM WITH CLIMATIC ISSUES, SOCIAL COSTS, ENVIRONMENTAL COSTS, LAND USE, CIVIL WORK PROBLEMS (IN GENERAL, CORROSION),                                                                                                            | (BOUWER , 2002A) |

| CASE                                                                         | RECHARGE TYPE                  | PLACE & TIME                     | DURATION OF THE PROJECT | MAIN PROBLEMS                                                                                                                                                                                                                                                                                                                                                                                                                                                                                                                                                                                                                                                                                                                                                                                                                                                | REFERENCE                                      |
|------------------------------------------------------------------------------|--------------------------------|----------------------------------|-------------------------|--------------------------------------------------------------------------------------------------------------------------------------------------------------------------------------------------------------------------------------------------------------------------------------------------------------------------------------------------------------------------------------------------------------------------------------------------------------------------------------------------------------------------------------------------------------------------------------------------------------------------------------------------------------------------------------------------------------------------------------------------------------------------------------------------------------------------------------------------------------|------------------------------------------------|
|                                                                              | GE SYSTEMS                     |                                  |                         |                                                                                                                                                                                                                                                                                                                                                                                                                                                                                                                                                                                                                                                                                                                                                                                                                                                              |                                                |
| ARTIFICIAL RECHARGE OF AQUIFERS                                              | INFILTRATION BASINS AND CANALS | SAN JUAN RIVER BASIN (ARGENTINA) | NA                      | <p>PROBLEMS – SEDIMENTATION OF FINE MATERIAL (CLOGGING, TURBIDITY, ETC.), FLOODING RISK (THE FLOODS MAY INTERFERE WITH THE INFILTRATION BASIN), DEPOSITION PROBLEMS, CORROSION, EROSION PROBLEMS, CIVIL DAMAGE (OTHERS), VANDALISM PROBLEMS (MAY BE CONSIDERED AS TERRORISM?), DROUGH PROBLEMS, DURING DROUGH STAGES THERE MAY BE A SHORTAGE OF WATER RESOURCES TO FEED THE RECHARGE, LACK OF INCENTIVES (LEGISLATIVE AND ECONOMICAL) FOR MAINTENANCE, LACK OF ENOUGH WATER TO HAVE AN ECONOMICALLY FEASIBLE RECHARGE, PROBLEM WITH NUTRIENTS (N AND P), RISK OF AQUIFER DISSOLUTION, LEGISLATION PROBLEMS (OTHERS, RELATED TO ENVIRONMENTAL IMPACT OF THE LANDSCAPE), HIGH THICKNESS AND NOT SHALLOW AQUIFER</p> <p>NOT PROBLEM – LOW MAINTENANCE COSTS, LOW DESIGN AND CONSTRUCTION COSTS, USUALLY THE TECHNICAL KNOWLEDGE OF THIS TECHNOLOGY IS HIGH,</p> | (NATIONS AND PROGRAM ME, 2011))                |
| INVESTIGATING THE CAUSES OF WATER-WELL FAILURE IN THE GAOTLHOBOGWE WELLFIELD | DEEP WELLS                     | SOUTHEAST BOTSWANA               | 8 YEARS                 | <p>PROBLEMS – WATER QUALITY (METALS, SALINITY/SODICITY, NITROGEN, PHOSPHORUS, ETC.), LOW QUANTITY OF WATER RESOURCES, PROBLEMS WITH INFILTRATION RATE, RISK OF LOW WATER STORAGE, CHEMICAL CLOGGING (PRECIPITATION OF CALCITE DUE TO WATER MIXTURE), PROBLEMS WITH THE DESIGN AND OPERATION OF THE WELLS</p>                                                                                                                                                                                                                                                                                                                                                                                                                                                                                                                                                 | (CHAOKA ET AL., 2006)                          |
| AQUIFER STORAGE AND RECOVERY                                                 | DEEP WELLS                     | CALIFORNIA (USA)                 | NA                      | <p>PROBLEMS – WATER QUALITY (SUSPENDED SOLIDS, SALINITY/SODICITY, SOCIAL UNACCEPTANCE (TASTE IN WATER), LEGAL CONSTRAINTS (NOT ACCOMPLISHING DRINKING STANDARDS) , MOVILISATION OF TRACE ELEMENTS, PRECIPITATION (CHEMICAL CLOGGING), CLOGGING (SEDIMENT AND MICROBIOLOGICAL), IN GENERAL CLOGGING IS THE MOST TYPICALL PROBLEM, INFILTRATION PROBLEMS, CIVIL WORK FAILURES (LIQUEFACTION), NATURAL HAZARDS (EARTHQUAKE), TERRORISTS ATTACKS</p>                                                                                                                                                                                                                                                                                                                                                                                                             | (“USGS CALIFORNIA WATER SCIENCE CENTER,” 2015) |
| TROUBLESHOOTING WATER WELL PROBLEMS                                          | DEEP WELLS                     | NA                               | NA                      | <p>PROBLEMS – IMPROPER WELL DESIGN AND OPERATION, INCOMPLETE WELL DEVELOPMENT, BOREHOLE STABILITY PROBLEMS, INCRUSTATION BUILD-UP (CLOGGING DUE TO CHEMICAL ISSUES WITH WATER), BIOFOULING CLOGGING DUE TO MICROBIOLOGICAL ISSUES), CORROSION, AQUIFER PROBLEMS, OVER PUMPING (SEDIMENT PARTICLE MOVING, SEDIMENTATION, EROSION, COMPACTION), NUTRIENT PROBLEMS (N AND P), GAS GENERATION (BACTERIAL AND</p>                                                                                                                                                                                                                                                                                                                                                                                                                                                 | (GOVERNMENT OF ALBERTA, N.D.)                  |

| CASE                                                                | RECHARGE TYPE                       | PLACE & TIME                         | DURATION OF THE PROJECT | MAIN PROBLEMS                                                                                                                                                                                                                                                                                                                                                                                                                                                                                                                                                                                                                                                                                                                                       | REFERENCE                  |
|---------------------------------------------------------------------|-------------------------------------|--------------------------------------|-------------------------|-----------------------------------------------------------------------------------------------------------------------------------------------------------------------------------------------------------------------------------------------------------------------------------------------------------------------------------------------------------------------------------------------------------------------------------------------------------------------------------------------------------------------------------------------------------------------------------------------------------------------------------------------------------------------------------------------------------------------------------------------------|----------------------------|
|                                                                     |                                     |                                      |                         | INAPPROPRIATE DESIGN), LACK OF RECHARGE, CLIMATE ISSUES, DROUGH PERIODS, CIVIL WORK FAILURE (PIPES BREAKAGE AND OTHERS), LOW INFILTRATION, WATER QUALITY ISSUES (METALS, NUTRIENTS AND ORGANIC COMPOUNDS)                                                                                                                                                                                                                                                                                                                                                                                                                                                                                                                                           |                            |
| AUSTRALIAN GUIDELINES FOR WATER RECYCLING: MANAGED AQUIFER RECHARGE | DEEP WELLS                          | AUSTRALIA                            | NA                      | NOT PROBLEM - LOW CAPITAL COSTS (MANAGED RECHARGE IS OFTEN THE MOST ECONOMIC FORM OF NEW WATER SUPPLY), NO EVAPORATION LOSS, NOT ALGAE OR MOSQUITOES (UNLIKE DAMS), NO LOSS OF PRIME VALLEY FLOOR LAND (EROSION), ABILITY TO USE SALINE AQUIFERS THAT COULD NOT BE DIRECTLY USED FOR SUPPLIES, POTENTIAL LOCATION CLOSE TO NEW WATER SOURCES, AND WHERE DEMAND FOR WATER IS HIGH, AQUIFERS PROVIDING TREATMENT AS WELL AS STORAGE, LOW GREENHOUSE GAS EMISSIONS COMPARED TO REMOTE PUMPED STORAGES, ABLE TO BE BUILT TO THE SIZE REQUIRED FOR INCREMENTAL GROWTH IN WATER DEMAND, PROVISION OF EMERGENCY AND STRATEGIC RESERVES, IMPROVED RELIABILITY OF EXISTING SUPPLIES, IMPROVED ENVIRONMENTAL FLOWS IN WATER SUPPLY CATCHMENTS FOR URBAN AREAS | (EPHC/NH MRC/NRM MC, 2008) |
| AUSTRALIAN GUIDELINES FOR WATER RECYCLING: MANAGED AQUIFER RECHARGE | GENERAL ARTIFICIAL RECHARGE SYSTEMS | AUSTRALIA                            | NA                      | DEEP WELLS – PREFERABLY USED WHEN THERE ARE CONFINED AQUIFERS OR SUPERFICIAL CLAY LEVELS, CAN WORK WITH LOW INFILTRATION RATE, LOW LAND USE/COST, EASE OF TRAFFIC ACCESS, COMPATIBILITY OF LAND USE, SUSPENDED SOLIDS AND NUTRIENTS USUALLY LEAD TO CLOGGING PROBLEMS<br>INFILTRATION PONDS – PREFERRED WHEN LAND COST/USE IS CHEAP<br>GENERAL INFO - USUALLY ARTIFICIAL RECHARGE HAS GOOD SOCIAL ACCEPTANCE AND SUFFICIENT RESIDENCE TIMES FOR WATER, THIS RESIDENCE TIME IMPLIES LESS TREATMENT FOR THE WATER AND LESS RISK FOR PATHOGENS                                                                                                                                                                                                         | (EPHC/NH MRC/NRM MC, 2008) |
| AUSTRALIAN GUIDELINES FOR WATER RECYCLING: MANAGED AQUIFER RECHARGE | GENERAL ARTIFICIAL RECHARGE SYSTEMS | AUSTRALIA                            | NA                      | GENERAL INFO – ARTIFICIAL RECHARGE DEPENDS MAINLY ON THE AVAILABILITY OF APPROPRIATE AQUIFERS, SUFFICIENT VOLUMES OF WATER ARE NEEDED TO JUSTIFY THE COSTS OF THE PROJECT, PLACES WITH SURFACE AQUIFERS CAUSE STRUCTURAL PROBLEMS, SALINISATION AND WATERLOGGING.                                                                                                                                                                                                                                                                                                                                                                                                                                                                                   | (EPHC/NH MRC/NRM MC, 2008) |
| AUSTRALIAN GUIDELINES FOR WATER RECYCLING: MANAGED AQUIFER RECHARGE | DEEP WELLS                          | NORTHERN ADELAIDE PLAINS (AUSTRALIA) | NA                      | PROBLEMS – SALINITY, AQUIFER HETEROGENITY, WATER MIXTURE, NEED TO HAVE A WATER TREATMENT PLANT (DESIGN AND CONSTRUCTION COSTS, OPERATIONAL COSTS)<br><br>NOT PROBLEMS – MEET DRINKING WATER REQUIREMENTS                                                                                                                                                                                                                                                                                                                                                                                                                                                                                                                                            | (EPHC/NH MRC/NRM MC, 2008) |

| CASE                                                                                                    | RECHARGE TYPE                       | PLACE & TIME     | DURATION OF THE PROJECT | MAIN PROBLEMS                                                                                                                                                                                                                                                                                                                                                                                            | REFERENCE                   |
|---------------------------------------------------------------------------------------------------------|-------------------------------------|------------------|-------------------------|----------------------------------------------------------------------------------------------------------------------------------------------------------------------------------------------------------------------------------------------------------------------------------------------------------------------------------------------------------------------------------------------------------|-----------------------------|
| AUSTRALIAN GUIDELINES FOR WATER RECYCLING: MANAGED AQUIFER RECHARGE                                     | GENERAL ARTIFICIAL RECHARGE SYSTEMS | AUSTRALIA        | NA                      | PROBLEMS – PATHOGENS, INORGANIC CHEMICALS, SALINITY AND SODICITY, NUTRIENTS, ORGANIC CHEMICALS, TURBIDITY AND PARTICULATES, RADIONUCLIDES, PRESSURE/FLOW RATES/VOLUMES/LEVELS OF WATER, CONTAMINANT MIGRATION IN FRACTURED AND CARSTIC AQUIFERS, AQUIFER DISSOLUTION, WELL STABILITY, IMPACT ON GROUNDWATER ECOSYSTEMS, GREENHOUSE GASES GENERATION (MICROBIOLOGICAL ISSUES)                             | (EPHC/NH MRC/NRMC, 2008)    |
| AUSTRALIAN GUIDELINES FOR WATER RECYCLING: MANAGED AQUIFER RECHARGE                                     | GENERAL ARTIFICIAL RECHARGE SYSTEMS | AUSTRALIA        | NA                      | PROBLEMS – INCREASE IRON, MANGANESE, ARSENIC, TRACE SPECIES AND HYDROGEN SULFIDE, SODICITY/SALINITY PROBLEMS, NUTRIENT ISSUES,                                                                                                                                                                                                                                                                           | (EPHC/NH MRC/NRMC, 2008)    |
| MOBILIZATION OF ARSENIC AND OTHER TRACE ELEMENTS DURING AQUIFER STORAGE AND RECOVERY, SOUTHWEST FLORIDA | DEEP WELLS                          | FLORIDA (USA)    | NA                      | PROBLEMS – ARSENIC, MANGANESE, URANIUM (RADIONUCLIDES), ORGANIC COMPOUNDS, WATER RESIDENCE TIME, AQUIFER AND INPUT WATER CHEMISTRY PROBLEMS (DO, PH, ETC.), AQUIFER MATRIX CHEMISTRY/MINERALOGY, SITE SPECIFIC HYDROGEOLOGY/HIDROCHEMISTRY, WATER MIXTURE                                                                                                                                                | (AIKEN AND KUNIANSKY, 2002) |
| AUSTRALIAN GUIDELINES FOR WATER RECYCLING: MANAGED AQUIFER RECHARGE                                     | GENERAL ARTIFICIAL RECHARGE SYSTEMS | AUSTRALIA        | NA                      | GENERAL INFO – ABOUT CLOGGING THERE'S INFO FROM 14 INJECTION PLACES THAT SUFFERED CLOGGING PROBLEMS. FROM THE 14 SITES, 8 WERE BIOLOGICAL CLOGGING, 9 PHYSICAL CLOGGING AND 1 WAS CHEMICAL CLOGGING (IN SOME CASES THERE WAS A MIXTURE BETWEEN TWO TYPES OF CLOGGING)                                                                                                                                    | (EPHC/NH MRC/NRMC, 2008)    |
| SOURCES OF HIGH-CHLORIDE WATER TO WELLS, EASTERN SAN JOAQUIN GROUND-WATER SUBBASIN, CALIFORNIA          | DEEP WELLS                          | CALIFORNIA (USA) | NA                      | PROBLEMS – SALINITY/SODICITY, CHLORIDE, METALS (ARSENIC, MANGANESE, ETC.), NUTRIENTS (NITRATES), WATER MIXTURE, WATER EVAPORATION                                                                                                                                                                                                                                                                        | (AIKEN AND KUNIANSKY, 2002) |
| AQUIFER STORAGE AND RECOVERY FOR THE CITY OF ROSEVILLE: A CONJUNCTIVE USE PILOT PROJECT                 | DEEP WELLS                          | CALIFORNIA (USA) | NA                      | PROBLEMS – ORGANIC CHEMICALS (THM, DBP), DESIGN AND CONSTRUCTION COSTS (PROJECTS OF WATER RECHARGE WITH A COST OF MORE THAN 215 MILLION \$), LEGISLATION ISSUES (NATIONAL AND LACK OF COORDINATION), TRACE ELEMENTS (METALS), MECHANICAL COMPLICATIONS (CIVIL WORK FAILURE – OTHERS), SODICITY/SALINITY, MICROBIOLOGICAL ISSUES (LEGISLATION ABOUT BACTERIA INPUT IN THE RECHARGE WATER), WATER MIXTURE, | (AIKEN AND KUNIANSKY, 2002) |

| CASE                                                                                                                                                                | RECHARGE TYPE       | PLACE & TIME          | DURATION OF THE PROJECT | MAIN PROBLEMS                                                                                                                                                                                                                                                                                                                                                                                                                                                                                                                                                                                                                                                                      | REFERENCE                      |
|---------------------------------------------------------------------------------------------------------------------------------------------------------------------|---------------------|-----------------------|-------------------------|------------------------------------------------------------------------------------------------------------------------------------------------------------------------------------------------------------------------------------------------------------------------------------------------------------------------------------------------------------------------------------------------------------------------------------------------------------------------------------------------------------------------------------------------------------------------------------------------------------------------------------------------------------------------------------|--------------------------------|
|                                                                                                                                                                     |                     |                       |                         | QUALITY ISSUES (IN GENERAL, IT DOESN'T SPECIFY), AQUIFER THICKNESS AND AQUIFER DEPTH, WATER SCARCITY (DROUGHT)<br><br>NOT PROBLEM – NATURAL ATTENUATION,                                                                                                                                                                                                                                                                                                                                                                                                                                                                                                                           |                                |
| SAN GORGONIO PASS ARTIFICIAL RECHARGE INVESTIGATION                                                                                                                 | DEEP WELLS          | CALIFORNIA (USA) 1997 | 6 YEARS                 | PROBLEMS – LOW INFILTRATION RATE, HIGH THICKNESS/NOT SHALLOW AQUIFER, NATURAL HAZARDS (EARTHQUAKES), NUTRIENTS (NITROGEN DUE TO WASTEWATER LEAKAGE)                                                                                                                                                                                                                                                                                                                                                                                                                                                                                                                                | (FLINT AND ELLETT, 2005)       |
| THE EFFECTS OF ARTIFICIAL RECHARGE ON GROUNDWATER LEVELS AND WATER QUALITY IN THE WEST HYDROGEOLOGIC UNIT OF THE WARREN SUBBASIN, SAN BERNARDINO COUNTY, CALIFORNIA | DEEP WELLS          | CALIFORNIA (USA) 2004 | 5 YEARS                 | PROBLEMS – LOW INFILTRATION RATE, RESIDENCE TIME, LAND USE, RISK OF NUTRIENT MOBILISATION, WATER LEVEL DECLINE, NUTRIENTS (NITROGEN), ORGANIC CHEMICALS, WATER SCARCITY (DROUGHTS AND RAINFALL PERIODICITY), EVAPORATION, SEDIMENTATION, EROSION, REGIONAL HYDROGEOLOGY WATER IMBALANCE,<br><br>NO PROBLEM – NATURAL ATTENUATION                                                                                                                                                                                                                                                                                                                                                   | (U.S. GEOLOGICAL SURVEY, 2013) |
| HYDRO-LOGIC EFFECTS OF ARTIFICIAL-RECHARGE EXPERIMENTS WITH RECLAIMED WATER AT EAST MEADOW, LONG ISLAND, NEW YORK                                                   | INFILTRATION BASINS | NEW YORK (USA) 1982   | 2 YEARS                 | PROBLEMS – LAND USE, GAS GENERATION (PHYSICAL MOTIVES AND BAD DESIGN), LOW INFILTRATION RATES, SUSPENDED SOLIDS, CLOGGING (PHYSICAL AND BIOLOGICAL), MECHANICAL FAILURES, PONDING (UNWANTED WATER ACCUMULATION), MICROBIOLOGICAL ISSUES, DEVELOPMENT OF INSECT POPULATIONS, WATER QUALITY ISSUES (MAINLY MICROBIOLOGICAL, NUTRIENTS AND MAYBE OTHER WATER CHEMICAL COMPOUNDS), SALINITY/SODICITY, METALS, SLOPE FACTOR ISSUES (MOUNDING), WATER MIXING, ORGANIC CHEMICALS (ORGANIC MATTER), INORGANIC CHEMICALS, INEFFICIENT NATURAL ATTENUATION (DUE TO SHORT RESIDENCE TIME, NOT ENOUGH REACTION OF THE GEOLOGICAL MATERIALS OR DUE TO THE HIGH TREATMENT OF THE INJECTED WATER) | (SCHNEIDER ET AL., 1987)       |
| HYDRO-LOGIC EFFECTS OF ARTIFICIAL-RECHARGE EXPERIMENTS WITH RECLAIMED WATER AT EAST MEADOW, LONG ISLAND, NEW YORK                                                   | DEEP WELLS          | NEW YORK (USA) 1982   | 2 YEARS                 | PROBLEMS – SUSPENDED SOLIDS (TURBIDITY), CLOGGING (BACTERIAL, PHYSICAL AND CHEMICAL), METALS (IRON), SALINITY/SODICITY, LESS EFFICIENT TO MOVE LARGE QUANTITIES OF WATER THAN THE INFILTRATION BASINS, CLOGGING IS MORE A PROBLEM IN WELLS THAN IN BASINS, SLOPE FACTOR ISSUES (MOUNDING), INEFFICIENT NATURAL ATTENUATION (DUE TO SHORT RESIDENCE TIME, NOT ENOUGH REACTION OF THE GEOLOGICAL                                                                                                                                                                                                                                                                                     | (SCHNEIDER ET AL., 1987)       |

| CASE                                                                                         | RECHARGE TYPE       | PLACE & TIME        | DURATION OF THE PROJECT | MAIN PROBLEMS                                                                                                                                                                                                                                                                                                                                                                                                                                                                                                              | REFERENCE                |
|----------------------------------------------------------------------------------------------|---------------------|---------------------|-------------------------|----------------------------------------------------------------------------------------------------------------------------------------------------------------------------------------------------------------------------------------------------------------------------------------------------------------------------------------------------------------------------------------------------------------------------------------------------------------------------------------------------------------------------|--------------------------|
|                                                                                              |                     |                     |                         | MATERIALS OR DUE TO THE HIGH TREATMENT OF THE INJECTED WATER)                                                                                                                                                                                                                                                                                                                                                                                                                                                              |                          |
| THE ATLANTIS WATER RESOURCE MANAGEMENT SCHEME: 30 YEARS OF ARTIFICIAL GROUNDWATER RECHARGE   | INFILTRATION BASINS | SOUTH AFRICA (1980) | 30 YEARS                | PROBLEMS – CLOGGING (PHYSICAL, BIOLOGICAL AND CHEMICAL), METAL CONTENT (IRON), NOT ENOUGH WATER QUANTITY, ORGANIC MATTER, LOW INFILTRATION RATE, HIGH MAINTENANCE COSTS, GROUNDWATER POLLUTION, APPEARANCE OF ALIEN VEGETAL SPECIES, MICROBIOLOGICAL ISSUES, LAND OWNERSHIP PROBLEMS (IS NOT UNDER THE SAME LEGAL MANAGEMENT THAN THE REST OF THE RECHARGE FACILITY)<br><br>NOT PROBLEM – LOW SALINITY                                                                                                                     | (TREDOUX AND CAIN, 2010) |
| THE ATLANTIS WATER RESOURCE MANAGEMENT SCHEME: 30 YEARS OF ARTIFICIAL GROUNDWATER RECHARGE   | DEEP WELLS          | SOUTH AFRICA (1980) | 30 YEARS                | PROBLEMS – CLOGGING (PHYSICAL, BIOLOGICAL AND CHEMICAL), METAL CONTENT (IRON), NOT ENOUGH WATER QUANTITY, ORGANIC MATTER, LOW INFILTRATION RATE, HIGH MAINTENANCE COSTS, DROUGHT CONDITIONS, OVERPUMPING WATER (IMBALANCE BETWEEN THE WATER INJECTION AND PUMPING), GAS GENERATION (DUE TO PHYSICAL PROPERTIES AND INEFFICIENT DESIGN), GROUNDWATER POLLUTION, SALINITY/SODICITY PROBLEMS, MICROBIOLOGICAL ISSUES, LAND OWNERSHIP PROBLEMS (IS NOT UNDER THE SAME LEGAL MANAGEMENT THAN THE REST OF THE RECHARGE FACILITY) | (TREDOUX AND CAIN, 2010) |
| RECYCLING POLOKWANE'S TREATED WASTEWATER                                                     | INFILTRATION PONDS  | SOUTH AFRICA        | NA                      | PROBLEMS – HIGH THICKNESS AND NOT SHALLOW AQUIFER, EVAPORATION OF WATER (WATER LOSS), NUTRIENT PROBLEMS (MAINLY NITROGEN)                                                                                                                                                                                                                                                                                                                                                                                                  | (TREDOUX AND CAIN, 2010) |
| SMALL-SCALE BOREHOLE INJECTION IN NAMAQUALAND                                                | DEEP WELLS          | SOUTH AFRICA (1999) | 3 YEARS                 | PROBLEMS – LOW INFILTRATION RATE, SALINITY/SODICITY, CLOGGING (PHYSICAL)                                                                                                                                                                                                                                                                                                                                                                                                                                                   | (TREDOUX AND CAIN, 2010) |
| CALVINIA: TRIAL BOREHOLE INJECTION TESTS AND WATER QUALITY ASSESSMENT IN FRACTURED MUDSTONES | DEEP WELLS          | SOUTH AFRICA        | NA                      | PROBLEMS – LOW WATER STORAGE TIME (RESIDENCE TIME), HIGH WATER PH (WATER QUALITY PROBLEMS), HIGH FLUORIDE CONCENTRATIONS, HIGH ARSENIC CONCENTRATIONS, HIGH SULFATE CONCENTRATIONS, OXYGEN PENETRATION (REDOX PROCESSES), ENTRANCE OF GAS FROM THE ATMOSPHERE (DUE TO PHYSICAL MOTIVES AND BAD DESIGN).                                                                                                                                                                                                                    | (TREDOUX AND CAIN, 2010) |
| PRINCE ALBERT: BOREHOLE INJECTION FEASIBILITY STUDY IN FRACTURED SANDSTONES                  | DEEP WELLS          | SOUTH AFRICA        | NA                      | PROBLEMS – MICROBIOLOGICAL ISSUES, HIGH FLUORIDE CONCENTRATIONS, NUTRIENTS (MAINLY NITROGEN), CLOGGING (BIOLOGICAL AND CHEMICAL), IRON CONTENT, LOW QUANTITY WATER AVAILABLE (CLIMATE), LOW PERMEABILITY RATES,                                                                                                                                                                                                                                                                                                            | (TREDOUX AND CAIN, 2010) |



| CASE                                                                                                                                          | RECHARGE TYPE                             | PLACE & TIME           | DURATION OF THE PROJECT | MAIN PROBLEMS                                                                                                                                                                                                                                                                                                                                                                                                                                                                                         | REFERENCE                 |
|-----------------------------------------------------------------------------------------------------------------------------------------------|-------------------------------------------|------------------------|-------------------------|-------------------------------------------------------------------------------------------------------------------------------------------------------------------------------------------------------------------------------------------------------------------------------------------------------------------------------------------------------------------------------------------------------------------------------------------------------------------------------------------------------|---------------------------|
| BITOU MUNICIPALITY GROUNDWATER MANAGEMENT AND ARTIFICIAL RECHARGE FEASIBILITY STUDY                                                           | DEEP WELLS                                | SOUTH AFRICA           | 2 YEARS                 | PROBLEMS – WATER SCARCITY (WWTP FAILURE OR TOO LOW SUPPLY LIMIT), SALINITY/SODICITY, IRON CONTENT, AND ORGANIC MATTER, WATER MIXTURE (CHEMICAL REACTIONS), CLOGGING (CHEMICAL AND BIOLOGICAL), WATER IMBALANCE BETWEEN INJECTION AND WATER INPUT (NOT ENOUGH WATER FROM REGIONAL HYDROGEOLOGY), LEGAL CONSTRAINTS (OTHERS – ENVIRONMENTAL)                                                                                                                                                            | (TREDOUX AND CAIN, 2010)  |
| ARTIFICIAL RECHARGE OF THE WINDHOEK AQUIFER, NAMIBIA: WATER QUALITY CONSIDERATIONS                                                            | DEEP WELLS                                | NAMIBIA                | NA                      | PROBLEMS – SODICITY/SALINITY, HIGH SULFATE CONCENTRATIONS, HIGH IRON CONCENTRATIONS, PRESENCE OF A DISPOSAL SITE WHICH IS THE SOURCE OF ORGANIC POLLUTANTS INFILTRATION                                                                                                                                                                                                                                                                                                                               | (TREDOUX ET AL., 2009)    |
| IN THE FACE OF CHANGING CLIMATE: GROUNDWATER DEVELOPMENT THROUGH ARTIFICIAL RECHARGE IN HARD ROCK TERRAIN OF KUMAUN LESSER HIMALAYA           | INFILTRATION BASINS                       | KUMAUN LESSER HIMALAYA | NA                      | PROBLEMS - LOW CONDUCTIVITY OF THE WATER, FLOODS, DROUGHS, HIGH THICKNESS AND NOT SHALLOW AQUIFER, CIVIL WORK FAILURES (OTHERS – HIGH STEEP SLOPES), WATER SCARCITY (CLIMATE, DUE TO THE FACT THAT RAINFALL IS THE ONLY SOURCE OF WATER FOR THE RECHARGE)                                                                                                                                                                                                                                             | (TRIPATHI, 2016)          |
| ASSESSING RISK OF CLOGGING IN COMMUNITY SCALE MANAGED AQUIFER RECHARGE SITES FOR DRINKING WATER IN THE COASTAL PLAIN OF SOUTH-WEST BANGLADESH | INFILTRATION PONDS AND INFILTRATION WELLS | BANGLADESH             | NA                      | PROBLEMS – LOW INFILTRATION RATE, CIVIL WORK FAILURE (OTHERS – MAINLY RELATED TO THE MINAROLOGY OF THE TERRAIN), HIGH TURBIDITY (SUSPENDED SOLIDS), HIGH SULFATES, HIGH NUTRIENTS (PHOSPHORUS MAINLY), MICROBIOLOGICAL ISSUES, CLOGGING (PHYSICAL TYPE MAINLY), ORGANIC MATTER CONTENT, FILTER EFFICIENCY ISSUES, RESIDENCE TIME, NUTRIENTS (NITROGEN), CLOGGING (BIOLOGICAL), AQUIFER HETEROGENEICITY (DIFFERENT GEOLOGICAL MATERIAL LAYERS ON THE AQUIFER), WATER MIXTURE, SALINITY/SODICITY ISSUES | (SULTANA AND AHMED, 2016) |
| INVESTIGATION OF RECHARGE DYNAMICS AND FLOW PATHS IN A FRACTURED CRYSTALLINE AQUIFER IN SEMI-ARID INDIA USING BOREHOLE LOGS: IMPLICATIONS FOR | PERCOLATION TANK                          | INDIA (HYDERABAD)      | NA                      | PROBLEMS – GEOLOGICAL HETEROGENEICITY (DIFFERENT GEOLOGICAL MATERIAL LAYERS PRESENT), LOW INFILTRATION RATE, FLOODS, DROUGHS, NOT SHALLOW AQUIFER/GEOLOGY THICKNESS, NOT ENOUGH WATER (CLIMATE), WATER MIXING                                                                                                                                                                                                                                                                                         | (ALAZARD ET AL., 2016)    |

| CASE                                                                                                                                                                    | RECHARGE TYPE                                    | PLACE & TIME             | DURATION OF THE PROJECT | MAIN PROBLEMS                                                                                                                                                                                                                                                                                                                                                                                                                                   | REFERENCE              |
|-------------------------------------------------------------------------------------------------------------------------------------------------------------------------|--------------------------------------------------|--------------------------|-------------------------|-------------------------------------------------------------------------------------------------------------------------------------------------------------------------------------------------------------------------------------------------------------------------------------------------------------------------------------------------------------------------------------------------------------------------------------------------|------------------------|
| MANAGED AQUIFER RECHARGE                                                                                                                                                |                                                  |                          |                         |                                                                                                                                                                                                                                                                                                                                                                                                                                                 |                        |
| IMPACT OF A STORM-WATER INFILTRATION BASIN ON THE RECHARGE DYNAMICS IN A HIGHLY PERMEABLE AQUIFER                                                                       | INFILTRATION BASIN                               | ITALY                    | NA                      | PROBLEMS – LEGAL CONSTRAINTS, CLOGGING (PHYSICAL AND BIOLOGICAL), SUSPENDED SOLIDS,<br><br>NOT PROBLEM – HIGH RECHARGE RATE (PRECIPITATION), HIGH AMOUNT OF WATER AVAILABLE, HIGH INFILTRATION RATE                                                                                                                                                                                                                                             | (MASETTI ET AL., 2016) |
| AN INNOVATIVE ARTIFICIAL RECHARGE SYSTEM TO ENHANCE GROUNDWATER STORAGE IN BASALTIC TERRAIN: EXAMPLE FROM MAHARASHTRA, INDIA                                            | RECHARGE SHAFTS AND SUBSURFACE DAMS              | INDIA                    | NA                      | PROBLEM – LOW INFILTRATION RATE, EXCESSIVE WITHDRAWAL, WATER IMBALANCE (INPUT/OUTPUT OF WATER), WATER SCARCITY (CLIMATE), DROUGHS, EROSION ISSUES, SUSPENDED SOLIDS                                                                                                                                                                                                                                                                             | (BHUSARI ET AL., 2016) |
| INTEGRATED FRAMEWORKS FOR ASSESSING AND MANAGING HEALTH RISKS IN THE CONTEXT OF MANAGED AQUIFER RECHARGE WITH RIVER WATER                                               | SURFACE WATER FROM A RIVER (INFILTRATION BASINS) | FINLAND                  | NA                      | PROBLEMS – MICROBIOLOGICAL ISSUES, NUTRIENTS, CONTAMINANTS (ORGANIC AND INORGANIC), LACK OF COORDINATION (POLITICAL CONCERNS), ECONOMIC COSTS (DESIGN/CONSTRUCTION AND OPERATION), ORGANIC MATTER, PERSISTENT ORGANIC POLLUTANTS, LACK OF KNOWLEDGE, COST-BENEFIT IMBALANCE RELATED TO OTHER WATER RESOURCES OPTIONS (WHICH WOULD BE BETTER OR CHEAPER),                                                                                        | (ASSMUTH ET AL., 2016) |
| THE EFFECTS OF ARTIFICIAL RECHARGE OF GROUNDWATER ON CONTROLLING LAND SUBSIDENCE AND ITS INFLUENCE ON GROUNDWATER QUALITY AND AQUIFER ENERGY STORAGE IN SHANGHAI, CHINA | DEEP WELLS                                       | CHINA                    | NA                      | PROBLEMS – SURFACE COVER OF HARD AND LOW INFILTRATION RATE GEOLOGICAL MATERIALS, COMPACTION, SUBSIDENCE ISSUES, GEOLOGICAL LAYERS OVERLAPPING (NOT A CONTINUOUS AQUIFER BUT THE DISPOSITION OF DIFFERENT GEOLOGICAL MATERIAL LAYERS), AQUIFER TOO DEEP, CONTAMINANT MIGRATION, SULFATES INCREASE, ORGANIC CHEMICALS INCREASE (ORGANIC CONTAMINANTS POPS), NUTRIENT ISSUES (MAINLY NITROGEN), ORGANIC MATTER, CLOGGING (CHEMICAL AND BIOLOGICAL) | (SHI ET AL., 2016)     |
| IMPACT OF MANAGED AQUIFER RECHARGE ON THE CHEMICAL AND ISOTOPIC COMPOSITION OF A KARST AQUIFER,                                                                         | DEEP WELLS                                       | JORDAN, 40 KM NEAR AMMAN | NA                      | PROBLEMS – LIMITED KNOWLEDGE ABOUT HYDRAULIC AND GEOLOGIC CHARACTERISTICS OF THE ZONE, WATER SCARCITY (CLIMATE), KARSTIC AQUIFER ISSUES (DISSOLUTION), HYDROLOGICAL IMBALANCE, SALINITY ISSUES (BUT NOT DUE TO SODICITY), SULFATE                                                                                                                                                                                                               | (XANKE ET AL., 2015)   |

| CASE                                                                                                                                                          | RECHARGE TYPE                | PLACE & TIME      | DURATION OF THE PROJECT | MAIN PROBLEMS                                                                                                                                                                                                                                                                          | REFERENCE                    |
|---------------------------------------------------------------------------------------------------------------------------------------------------------------|------------------------------|-------------------|-------------------------|----------------------------------------------------------------------------------------------------------------------------------------------------------------------------------------------------------------------------------------------------------------------------------------|------------------------------|
| WALA RESERVOIR, JORDAN                                                                                                                                        |                              |                   |                         | ISSUES, NUTRIENTS, CHLORIDE, CLOGGING (PHYSICAL), SUSPENDED SOLIDS, LOW INFILTRATION RATE                                                                                                                                                                                              |                              |
| NATURAL ATTENUATION OF CHLOROBENZENE IN A DEEP CONFINED AQUIFER DURING ARTIFICIAL RECHARGE PROCESS                                                            | NA                           | SOUTH-WEST CHINA  | NA                      | PROBLEMS – ORGANIC CHEMICALS (POPS), SUSPENDED SOLIDS, CHLORIDE, LAND USE PROBLEMS (USES OF LAND FOR AGRICULTURE, INDUSTRY AND RESIDENTIAL HAVE DETERIORATED WATER QUALITY), WATER USES (INDUSTRY, URBAN AND AGRICULTURE),                                                             | (HE ET AL., 2016)            |
| ARTIFICIAL RECHARGE OF THE PHREATIC AQUIFER IN THE UPPER FRIULI PLAIN, ITALY, BY A LARGE INFILTRATION BASIN                                                   | INFILTRATION BASIN           | ITALY             | NA                      | PROBLEMS – LOW PERMEABILITY, NUTRIENT ISSUES (NITROGEN MAINLY), SULFATES, OVERLAPPING OF DIFFERENT GEOLOGICAL LAYERS (WITH CLAY), GEOLOGICAL/HYDRAULIC INFORMATION, HYDRAULIC IMBALANCE (INPUT OUTPUT OF THE RECHARGE IS NEGATIVE)<br><br>NOT PROBLEM – LOW SALINITY                   | (TEATINI ET AL., 2015)       |
| WATER QUALITY OF THE LITTLE ARKANSAS RIVER AND EQUUS BEDS AQUIFER BEFORE AND CONCURRENT WITH LARGE-SCALE ARTIFICIAL RECHARGE, SOUTH-CENTRAL KANSAS, 1995–2012 | DEEP WELLS                   | USA (KANSAS) 1995 | 6 YEARS                 | PROBLEMS – CHLORIDE, NUTRIENT ISSUES (MAINLY NITROGEN), TRACE ELEMENTS PROBLEMS (METALS MAINLY), NOT ENOUGH WATER RECHARGED (WATER INPUT IS TOO LOW COMPARED TO THE EXTRACTION AND THE TOTAL VOLUME OF THE AQUIFER), ORGANIC CHEMICALS (POPS), MICROBIOLOGICAL ISSUES (FECAL BACTERIA) | (GALLEGO S AND VARELA, 2015) |
| ARTIFICIAL RECHARGE IN LAS VEGAS VALLEY, CLARK COUNTY NEVADA                                                                                                  | INJECTION WELLS / DEEP WELLS | USA (LAS VEGAS)   | NA                      | PROBLEMS – HIGH THICKNESS AND NOT SHALLOW AQUIFER, SULFATE CONTENT, SODIUM CONTENT, CHLORIDE CONTENT, WATER MIXTURE, LOW WELL RECHARGE YIELD (PROBABLY DUE TO CLOGGING BUT UNKNOWN TYPE), ECONOMIC CONSTRAINTS (OPERATIONAL)                                                           | (KATZER AND BROTHERS, 1989)  |
| WATER QUALITY CHANGES RELATED TO THE DEVELOPMENT OF ANAEROBIC CONDITIONS DURING ARTIFICIAL RECHARGE                                                           | INFILTRATION BASINS          | USA (TEXAS)       | NA                      | PROBLEMS – LOW INFILTRATION RATE, SODICITY/SALINITY ISSUES, HIGH SULFATE, HIGH CHLORIDE, VEGETATION/ALGAE GROWTH, GENERATION OF METABOLITES (H <sub>2</sub> S), LOW PH, CLOGGING (BIOLOGICAL)<br><br>NOT PROBLEM – LOW SUSPENDED SOLIDS CONTENT                                        | (WOOD AND BASSETT, 1975)     |

| CASE                                                                                                                                         | RECHARGE TYPE                                        | PLACE & TIME                | DURATION OF THE PROJECT | MAIN PROBLEMS                                                                                                                                                                                                                                                                                                                                                                                                              | REFERENCE                     |
|----------------------------------------------------------------------------------------------------------------------------------------------|------------------------------------------------------|-----------------------------|-------------------------|----------------------------------------------------------------------------------------------------------------------------------------------------------------------------------------------------------------------------------------------------------------------------------------------------------------------------------------------------------------------------------------------------------------------------|-------------------------------|
| A THIRTY YEAR ARTIFICIAL RECHARGE EXPERIMENT IN COASTAL AQUIFER IN AN ARID ZONE: THE TEBOULBA AQUIFER SYSTEM (TUNISIAN SAHEL)                | DEEP WELLS / INJECTION WELLS                         | TUNISIA (SAHEL) 1972 - 2002 | 30 YEARS                | PROBLEMS – WATER SCARCITY (DUE TO CLIMA AND PRECIPITATION), LOW QUANTITY OF WATER RESOURCES AVAILABLE FOR RECHARGE, HIGH SALINITY/SODICITY, LOW INFILTRATION RATE, LOW POROSITY, REGIONAL HYDROGEOLOGY PROBLEMS (NEGATIVE INPUT/OUTPUT RATIO)<br><br>NOT PROBLEM – CHEAPER WATER PRICES, COMPARED TO OTHER TECHNOLOGIES THE PRICES AND COSTS (DESIGN/CONSTRUCTION AND OPERATION) ARE BETTER IN AQUIFER ARTIFICIAL RECHARGE | (BOURI AND DHIA, 2010)        |
| ESTIMATING GROUNDWATER RECHARGE INDUCED BY ENGINEERING SYSTEMS IN A SEMIARID AREA (SOUTHEASTERN SPAIN)                                       | INFILTRATION BASINS (VIA CHECK DAMS AND GRAVEL PITS) | SPAIN (ALMERIA)             | NA                      | PROBLEMS – HIGH SLOPE, WATER SCARCITY (CLIMATE), CLOGGING (PHYSICAL)<br><br>NOT PROBLEM – GOOD INFILTRATION RATE                                                                                                                                                                                                                                                                                                           | (MARTÍN-ROSALES ET AL., 2007) |
| QUANTITATIVE PCR MONITORING OF ANTIBIOTIC RESISTANCE GENES AND BACTERIAL PATHOGENS IN THREE EUROPEAN ARTIFICIAL GROUNDWATER RECHARGE SYSTEMS | RIVER INFILTRATION                                   | SPAIN (SABADELL)            | 1 YEAR                  | PROBLEMS – MICROBIOLOGICAL ISSUES, LEGAL CONSTRAINTS (DOESN'T COMPLY WITH DRINKING STANDARDS)                                                                                                                                                                                                                                                                                                                              | (BÖCKEL MANN ET AL., 2009)    |
| QUANTITATIVE PCR MONITORING OF ANTIBIOTIC RESISTANCE GENES AND BACTERIAL PATHOGENS IN THREE EUROPEAN ARTIFICIAL GROUNDWATER RECHARGE SYSTEMS | DEEP WELLS                                           | ITALY (NARDÒ)               | 1 YEAR                  | PROBLEMS – LOW PH (POSSIBLY METAL DISSOLUTION AND MOBILISATION), WATER MIXTURE, MICROBIOLOGICAL ISSUES, WATER SCARCITY (CLIMATE), LEGAL CONSTRAINTS (DOESN'T COMPLY WITH DRINKING STANDARDS)                                                                                                                                                                                                                               | (BÖCKEL MANN ET AL., 2009)    |

| CASE                                                                                                                                          | RECHARGE TYPE                         | PLACE & TIME        | DURATION OF THE PROJECT | MAIN PROBLEMS                                                                                                                                                                                                                       | REFERENCE                  |
|-----------------------------------------------------------------------------------------------------------------------------------------------|---------------------------------------|---------------------|-------------------------|-------------------------------------------------------------------------------------------------------------------------------------------------------------------------------------------------------------------------------------|----------------------------|
| QUANTITATIVE PCR MONITORING OF ANTIBIOTIC RESISTANCE GENES AND BACTERIAL PATHOGENS IN THREE EUROPEAN ARTIFICIAL GROUNDWATER RECHARGE SYSTEMS  | INFILTRATION BASINS                   | BELGIUM /TORREEL E) | 1 YEAR                  | PROBLEMS – WATER MIXTURE, MICROBIOLOGICAL ISSUES, DESIGN AND CONSTRUCTION COSTS, OPERATIONAL COSTS (REVERSE OSMOSIS AND ULTRAFILTRATION TREATMENTS),                                                                                | (BÖCKELMANN ET AL., 2009)  |
| MODELING SEASONAL REDOX DYNAMICS AND THE CORRESPONDING FATE OF THE PHARMACEUTICAL RESIDUE PHENAZONE DURING ARTIFICIAL RECHARGE OF GROUNDWATER | DEEP WELLS                            | GERMANY (BERLIN)    | NA                      | PROBLEMS – CLOGGING (UNKNOWN TYPE), LOW INFILTRATION RATE (PERIODICALLY CHANGING THIS RATE DUE TO CLOGGING ISSUES), NUTRIENTS, LOW NATURAL ATTENUATION                                                                              | (GRESKO WIAK ET AL., 2006) |
| INTEGRATED WATER MANAGEMENT FOR THE 21ST CENTURY: PROBLEMS AND SOLUTIONS                                                                      | NA                                    | NA                  | NA                      | PROBLEMS – LEGAL (OWNERSHIP, REUSE), CONTAMINATION (EXTERNAL POLLUTANTS AND WASTE WATER RECHARGED POLLUTANTS), SALINITY, WATER SHORTAGE DUE TO CLIMATE CHANGE, FLOODING DUE TO CLIMATE CHANGE, NOT ENOUGH WATER EXTRACTED FROM MAR. | (BOUWER , 2002B)           |
| GROUNDWATER RECHARGE WITH RECLAIMED MUNICIPAL WASTEWATER: HEALTH AND REGULATORY CONSIDERATIONS TAKASHI                                        | SURFACE SPREADING AND INJECTION WELLS | NA                  | NA                      | PROBLEMS – LEGAL (HEALTH LAWS), CONTAMINATION (EXTERNAL, TRACE CONTAMINANTS, ETC.), LACK OF KNOWLEDGE ABOUT THE RISKS AND PROBLEMS,                                                                                                 | (ASANO AND COTRUVO , 2004) |
| FUTURE MANAGEMENT OF AQUIFER RECHARGE                                                                                                         | ALL                                   | NA                  | NA                      | PROBLEMS – WATERLOGGING, DAMAGE TO STRUCTURES, FLOODING, SOIL SALINISATION, LEGAL ISSUES, WATER QUALITY, LACK OF KNOWLEDGE                                                                                                          | (DILLON, 2005)             |

| CASE                                                                                                                                   | RECHARGE TYPE                          | PLACE & TIME                                                         | DURATION OF THE PROJECT | MAIN PROBLEMS                                                                                                                                                                                                                                                                   | REFERENCE            |
|----------------------------------------------------------------------------------------------------------------------------------------|----------------------------------------|----------------------------------------------------------------------|-------------------------|---------------------------------------------------------------------------------------------------------------------------------------------------------------------------------------------------------------------------------------------------------------------------------|----------------------|
| MANAGED AQUIFER RECHARGE: AN ASSESSMENT OF ITS ROLE AND EFFECTIVENESS IN WATERSHED MANAGEMENT                                          | INFILTRATION BASIN AND CHECK DAMS      | KOLWAN VALLEY 1998                                                   | NA                      | PROBLEMS – WATER SCARCITY (TO INFILTRATE), LACK OF INFORMATION, LACK OF WORKFORCE, MAINTENANCE COSTS, LEGAL ISSUES, OWNERSHIP ISSUES, COST-BENEFIT SHRINKING ISSUES, TENSIONS BETWEEN GOVERNMENT/AGENCIES/PEOPLE, INCREASED WATER ABSTRACTION, CLIMATE CHANGE ISSUES, CLOGGING. | (GALE ET AL., 2006)  |
| MANAGED AQUIFER RECHARGE: AN ASSESSMENT OF ITS ROLE AND EFFECTIVENESS IN WATERSHED MANAGEMENT                                          | CHECK DAM AND PERCOLATION TANK         | SATLASANA (MUMANVAS, BHANAVAS 1, BBHANAVAS 2 AND SAMRAPUR) 2001-2003 | NA                      | PROBLEMS – INVESTMENT COSTS ISSUES, LAND USE (19,5 KM <sup>2</sup> ), CLOGGING, LOW WATER RETENTION, HIGH FLUORIDE, HIGH NA, HIGH NO <sub>3</sub> -                                                                                                                             | (GALE ET AL., 2006)  |
| MANAGED AQUIFER RECHARGE: AN ASSESSMENT OF ITS ROLE AND EFFECTIVENESS IN WATERSHED MANAGEMENT                                          | INFILTRATION BASIN AND CHECK DAM       | COIMBATORE (KARNAMPETTAI, KODAGIPALAYA1 AND KODANGIPALAYAM 2)        | NA                      | PROBLEMS – LAND USE, SOCIAL ACCEPTANCE, HIGH COSTS, LEGAL ISSUES, OWNERSHIP ISSUES, LACK OF MAINTENANCE (DUE TO COSTS, LACK OF KNOWLEDGE AND UNWILLINGNESS), LOW INFILTRATION RATES (MAINLY DUE TO CLOGGING), HIGH CONCENTRATIONS OF BA, FE AND NO <sub>3</sub> -               | (GALE ET AL., 2006)  |
| ORGANIC MICROPOLLUTANT REMOVAL FROM WASTEWATER EFFLUENT-IMPACTED DRINKING WATER SOURCES DURING BANK FILTRATION AND ARTIFICIAL RECHARGE | BANK FILTRATION AND INFILTRATION BASIN | GERMANY 2002                                                         | 3 YEARS                 | PROBLEMS – VERY HIGH RETENTION TIME FOR BANK FILTRATION, VERY SHORT RETENTION TIME FOR INFILTRATION BASIN, BOTH HAD PROBLEMS WITH WATER QUALITY (MICROPOLLUTANTS, MOSTLY PHARMACEUTICAL PRODUCTS).                                                                              | (MAENG ET AL., 2010) |

| CASE                                                                                                                                                        | RECHARGE TYPE        | PLACE & TIME | DURATION OF THE PROJECT | MAIN PROBLEMS                                                                                                                                                    | REFERENCE                   |
|-------------------------------------------------------------------------------------------------------------------------------------------------------------|----------------------|--------------|-------------------------|------------------------------------------------------------------------------------------------------------------------------------------------------------------|-----------------------------|
| BIOGEOCHEMICAL PROCESSES DURING THE INFILTRATION OF RIVER WATER INTO AN ALLUVIAL AQUIFER                                                                    | RIVERBANK FILTRATION | FRANCE       | NA                      | PROBLEMS – SEDIMENTS WHERE WATER INFILTRATES ARE CONTAMINATED WITH ZINC AND CADMIUM                                                                              | (SITE, 1993)                |
| USE OF STATIC QUANTITATIVE MICROBIAL RISK ASSESSMENT TO DETERMINE PATHOGEN RISKS IN AN UNCONFINED CARBONATE AQUIFER USED FOR MANAGED AQUIFER RECHARGE SIMON | INJECTION WELLS      | AUSTRALIA    | NA                      | PROBLEMS – CHEMICAL CLOGGING                                                                                                                                     | (TOZE ET AL., 2010)         |
| STUDY OF THE FEASIBILITY OF AN AQUIFER STORAGE AND RECOVERY SYSTEM IN A DEEP AQUIFER IN BELGIUM                                                             | INJECTION WELLS      | BELGIUM      | NA                      | PROBLEMS – QUALITY ISSUES DUE TO WATER MIXING, LOW AMOUNT OF RECOVERED WATER, QUALITY ISSUES (PHOSPHATE, WATER COLOUR, DOC), CLOGGING (PHYSICAL AND BIOLOGICAL). | (VANDENBOHEDE ET AL., 2008) |
| EFFECTIVENESS OF RIVERBANK FILTRATION FOR REMOVAL OF NITROGEN FROM HEAVILY POLLUTED RIVERS: A CASE STUDY OF KUIHE RIVER, XUZHOU, JIANGSU, CHINA             | RIVERBANK FILTRATION | CHINA        | NA                      | PROBLEMS – QUALITY ISSUES (HIGH NITROGEN CONCENTRATIONS), LOW DEGRADATION OF POLLUTANTS                                                                          | (WU ET AL., 2007)           |

\*MONITORING, DATA COLLECTION AND ZONE STUDY ARE ASPECTS THAT SHOULD BE TAKEN INTO ACCOUNT BECAUSE THEY CAN LEAD TO FAILURE OF THE MAR FACILITY IF THEY ARE NOT DONE CORRECTLY (MISSINFORMATION OF THE MEASURES, UNACCEPTABLE COSTS OR BAD SPATIAL DISTRIBUTION)

\*CORROSION OF METAL COMPONENTS IN THE PIPES AND MACHINES IS A COMMON PROBLEM.

- \*INSUFICIENT EVIDENCE FOR RISK QUANTIFICATION FOR SOME ISSUES (LIKE INORGANIC CHEMICALS)
- \*THERE'S USUALLY THE NEED OF WWTP AND DESSALATION PLANTS TO TREAT THE WATER PRIOR TO INJECTION (MOST CASES)
- \*USUALLY THERE'S A LACK OF REGULATORY PRECEDENT
- \*USUALLY ARTIFICIAL RECHARGE IMPLIES WATER PUMPING (FOR AGRICULTURAL, INDUSTRIAL OR URBAN USES) SO MAYBE THERE'S AN IMBALANCE BETWEEN THE WATER ENTERING THE SYSTEM AND THE WATER BEING PUMPED OUT OF IT
- \*THERE SHOULD BE INCLUDED A FAILURE DUE TO LATERAL INFILTRATION INSTEAD OF VERTICAL INFILTRATION
- \*GENERATION OF METABOLITES IS AN ISSUE THAT USUALLY HAPPENS WHERE THERE ARE MICROBIOLOGICAL PROBLEMS
- \*STORM QUALITY MONITORING IS IMPORTANT IN ORDER TO IDENTIFY AND CONTROL WATER INPUTS TO THE SYSTEM (KNOWING THEIR QUALITY AND QUANTITY)
- \*SOMETIMES THE PROBLEM IS NOT THE INFILTRATION RATE BUT THE POROSITY OR CONDUCTIVITY



## **S2. LITERATURE REVIEW OF MANAGED AQUIFER RECHARGE FAILURES**

|              |                                                                                                                                                                                                                                                                                                               |
|--------------|---------------------------------------------------------------------------------------------------------------------------------------------------------------------------------------------------------------------------------------------------------------------------------------------------------------|
| <b>LEG</b>   | Legal constraints - Changes in the legislation or failures to comply with its requirements (especially for health or environmental legislation).                                                                                                                                                              |
| <b>TER</b>   | Territorial constraints                                                                                                                                                                                                                                                                                       |
| <b>EU</b>    | European                                                                                                                                                                                                                                                                                                      |
| <b>NAT</b>   | National                                                                                                                                                                                                                                                                                                      |
| <b>REG</b>   | Regional/Local                                                                                                                                                                                                                                                                                                |
| <b>SC</b>    | Scope of legislation – Depending on the legislation type, its restrictions and risk probabilities can be significantly different.                                                                                                                                                                             |
| <b>HTH</b>   | Health legislation                                                                                                                                                                                                                                                                                            |
| <b>OTH</b>   | Others – Mainly environmentally related legislation that can pose some kind of restrictions to the operation of the Mar facility.                                                                                                                                                                             |
| <b>ECO</b>   | Economic constraints                                                                                                                                                                                                                                                                                          |
| <b>MAC</b>   | Macroeconomic constraints – Restrictions related to global effects on economy like crisis, changes in currency value, increase of the petroleum price, etc. That may cause a reduction on the interest in recharging water or a reduction on the quantity recharged.                                          |
| <b>MIC</b>   | Microeconomic constraints                                                                                                                                                                                                                                                                                     |
| <b>NEWR</b>  | Not enough water to recharge due to other economical uses                                                                                                                                                                                                                                                     |
| <b>IND</b>   | Industrial use                                                                                                                                                                                                                                                                                                |
| <b>AGR</b>   | Agricultural use                                                                                                                                                                                                                                                                                              |
| <b>DOM</b>   | Domestic use                                                                                                                                                                                                                                                                                                  |
| <b>COST</b>  | Cost restriction                                                                                                                                                                                                                                                                                              |
| <b>LWP</b>   | Low price of water – MAR has fixed costs and the water that produces has a fixed price, however other water sources can have a variable price that may be cheaper than the water obtained by MAR sources and therefore, the incentive for developing MAR is lowered.                                          |
| <b>HCST</b>  | High installation cost                                                                                                                                                                                                                                                                                        |
| <b>MAINT</b> | High maintenance cost/maintenance requirements                                                                                                                                                                                                                                                                |
| <b>FUND</b>  | Lack of private/public funding                                                                                                                                                                                                                                                                                |
| <b>SO</b>    | Social unacceptance – Neighbors and other citizens may dislike MAR due to their own opinions according to safety, health, noise, etc.                                                                                                                                                                         |
| <b>HTHR</b>  | Health risk perception                                                                                                                                                                                                                                                                                        |
| <b>HCOST</b> | High cost perception                                                                                                                                                                                                                                                                                          |
| <b>BRH</b>   | Behavioral requirements – MAR as any technical facility has safety procedures and a code of conduct for the workers and people related to the facility operation. Thus implying that people may be unwilling to accept a MAR facility because they fear a facility that needs safety requirements like these. |
| <b>CHILD</b> | Children surveillance                                                                                                                                                                                                                                                                                         |
| <b>FAIR</b>  | Fair distribution of treated water                                                                                                                                                                                                                                                                            |

|               |                                                                                                                                                                                                                 |
|---------------|-----------------------------------------------------------------------------------------------------------------------------------------------------------------------------------------------------------------|
| <b>EFFECT</b> | Perception of effectiveness                                                                                                                                                                                     |
| <b>GOV</b>    | Governance                                                                                                                                                                                                      |
| <b>CORD</b>   | Lack of coordination                                                                                                                                                                                            |
| <b>NTK</b>    | Non-technical knowledge                                                                                                                                                                                         |
| <b>SD</b>     | Structural Damages                                                                                                                                                                                              |
| <b>FL</b>     | Flooding                                                                                                                                                                                                        |
| <b>NH</b>     | Natural hazards (e.g. earthquake)                                                                                                                                                                               |
| <b>TA</b>     | Terrorism activities/Vandalism                                                                                                                                                                                  |
| <b>CV</b>     | Civil work failures                                                                                                                                                                                             |
| <b>SLP</b>    | Slope stability – Mostly for surface infiltration, it implies that the water recharge or accumulation in storage ponds may cause instabilities in the slopes and possibly causing landslides or wall breakages. |
| <b>PB</b>     | Pipe breakage                                                                                                                                                                                                   |
| <b>OTH</b>    | Others                                                                                                                                                                                                          |
| <b>AD</b>     | Aquifer dissolution (e.g. in karstic aquifer)                                                                                                                                                                   |
| <b>QUAT</b>   | Not enough water recharged                                                                                                                                                                                      |
| <b>LWIP</b>   | Low quality water                                                                                                                                                                                               |
| <b>BIO</b>    | Sanitary/biological restrictions (e.g. due the pathogens)                                                                                                                                                       |
| <b>PHY</b>    | Physical restrictions                                                                                                                                                                                           |
| <b>TP</b>     | Turbidity/particles                                                                                                                                                                                             |
| <b>CHE</b>    | Chemical restrictions                                                                                                                                                                                           |
| <b>MET</b>    | Metals (e.g. arsenic, manganese)                                                                                                                                                                                |
| <b>SL</b>     | Salinity and sodicity                                                                                                                                                                                           |
| <b>NUT</b>    | Nutrients (nitrogen, phosphorous)                                                                                                                                                                               |
| <b>OC</b>     | Organic chemicals (pollutants, EOCs)                                                                                                                                                                            |
| <b>RN</b>     | Radionuclides                                                                                                                                                                                                   |
| <b>WS</b>     | Water scarcity                                                                                                                                                                                                  |
| <b>CLIM</b>   | Climate                                                                                                                                                                                                         |
| <b>DRO</b>    | Droughts                                                                                                                                                                                                        |
| <b>WWTP</b>   | Waste water treatment plant failure                                                                                                                                                                             |
| <b>LAND</b>   | Desalination plant failure                                                                                                                                                                                      |
| <b>RIV</b>    | River regulation                                                                                                                                                                                                |
| <b>CLOG</b>   | Clogging                                                                                                                                                                                                        |

|             |                                                                                                                                                                                                                                       |
|-------------|---------------------------------------------------------------------------------------------------------------------------------------------------------------------------------------------------------------------------------------|
| <b>PCL</b>  | Physical clogging                                                                                                                                                                                                                     |
| <b>FDP</b>  | Failure deposition pond (particles from diverted water) – The particles may not be sedimented efficiently and still be present in the recharged water, diminishing and difficulting the entrance of water during recharge operations. |
| <b>PPF</b>  | Pipe filter fails                                                                                                                                                                                                                     |
| <b>RT</b>   | Residence time – Not enough residence time may cause an inefficient reduction and degradation of contaminants and pathogens.                                                                                                          |
| <b>SFP</b>  | Source fine particles (generation inside MAR facility)                                                                                                                                                                                |
| <b>TD</b>   | Transport sedimentation (erosion or deposition from recharge pond)                                                                                                                                                                    |
| <b>DP</b>   | Deposition                                                                                                                                                                                                                            |
| <b>ER</b>   | Erosion                                                                                                                                                                                                                               |
| <b>BCL</b>  | Bioclogging                                                                                                                                                                                                                           |
| <b>CCL</b>  | Chemical clogging                                                                                                                                                                                                                     |
| <b>EV</b>   | Evaporation (excess)                                                                                                                                                                                                                  |
| <b>WMX</b>  | Water mixtures – The combination of the aquifer natural water and the injected water may cause precipitation of minerals and therefore chemical clogging, reducing the amount of water recharged into the aquifer.                    |
| <b>MIC</b>  | Microbial population catalysis – Microbial population may cause changes in the water chemistry which in turn can imply precipitation of minerals or other byproducts (microbial biofilms) which can reduce recharged water.           |
| <b>COM</b>  | Compaction                                                                                                                                                                                                                            |
| <b>GAS</b>  | Generation of gas (e.g. bubble formation)                                                                                                                                                                                             |
| <b>PHM</b>  | Physical Motives                                                                                                                                                                                                                      |
| <b>BAC</b>  | Bacterial processes                                                                                                                                                                                                                   |
| <b>ID</b>   | Inappropriate design                                                                                                                                                                                                                  |
| <b>QUAL</b> | Unacceptable quality of water at sensitive location                                                                                                                                                                                   |
| <b>AN</b>   | Inefficient natural attenuation                                                                                                                                                                                                       |
| <b>OM</b>   | Organic matter                                                                                                                                                                                                                        |
| <b>EOC</b>  | Emerging organic compounds                                                                                                                                                                                                            |
| <b>UN</b>   | Nutrients                                                                                                                                                                                                                             |
| <b>MET</b>  | Generation of metabolites – The chemicals injected or already present in the aquifer may be degraded and then transformed into another compounds which may be equally or more dangerous                                               |

than the previous ones, therefore affecting the quality of the water.

|                       |                                                                                                                                                                                                                                                                  |
|-----------------------|------------------------------------------------------------------------------------------------------------------------------------------------------------------------------------------------------------------------------------------------------------------|
| <b>NC</b>             | Nitrogen cycle (NO <sub>2</sub> <sup>-</sup> , N <sub>2</sub> O...)                                                                                                                                                                                              |
| <b>EOC</b>            | Emerging organic compounds                                                                                                                                                                                                                                       |
| <b>H<sub>2</sub>S</b> | Other nutrient cycles (H <sub>2</sub> S)                                                                                                                                                                                                                         |
| <b>MOB</b>            | Mobilization                                                                                                                                                                                                                                                     |
| <b>MET</b>            | Metals                                                                                                                                                                                                                                                           |
| <b>ST</b>             | Specific targets – A MAR project can be done for many reasons but there is always one or a couple of them that are the main ones for the project. Those reasons may have specific objectives that need to be achieved in order to have a successful MAR project. |
| <b>SWB</b>            | Seawater barriers                                                                                                                                                                                                                                                |
| <b>PROT</b>           | Protected water body                                                                                                                                                                                                                                             |
| <b>WL</b>             | Water levels                                                                                                                                                                                                                                                     |
| <b>RIV</b>            | River                                                                                                                                                                                                                                                            |
| <b>SPR</b>            | Spring                                                                                                                                                                                                                                                           |
| <b>WET</b>            | Wetland                                                                                                                                                                                                                                                          |

### **S3. RISKMAR APP MANUAL**

The programming language of the MAR-RISKAPP was Visual Basic. Which is based on the usage of macros, which are usually short programming code lines that are used to give some kind of orders to the program in order to do some specific calculations or to set automatically some kind of properties for the working environment (among other kind of possibilities) and objects.

The result was the MAR-RISKAPP tool which allows the user to define four probability categories (high risk, medium risk, low risk and no risk) of failure for each type MAR event and therefore calculate the risk of a general MAR failure (representing the different probabilities within a fault tree).

The MAR-RISKAPP was structured in four main steps: 1) HOME, 2) INPUT, 3) RESULTS and 4) GRAPHICAL RESULTS.

The application starts with the HOME step. This first stage shows the name of the tool, the creators and the main institutions involved in it, with a clear indication that the tool was developed within the framework of project MARSOL. From this starting point, there are two possible ways to proceed: 1) HELP (which sends the user to a general explanation of the tool and its operational set can be found), and 2) START (which sends the user to the second step of the tool – INPUT).

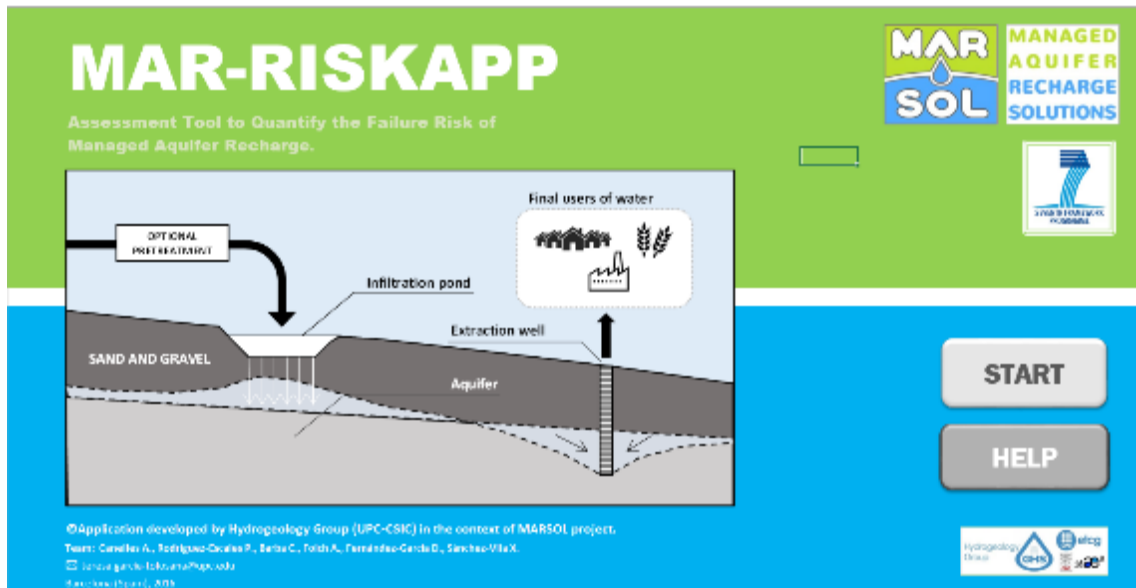

Figure S3.1. Home layout visualization.

The second step of the tool is INPUT. At this point, the user has to choose the risk category of the different events for both non-technical and technical issues (the Input sheet can be seen in Figure S3.2). This step implies that data has to be filled in four different sheets: 1) NON-TECHNICAL CONSTRAINTS - DESIGN AND CONSTRUCTION (Figure S3.3), 2) TECHNICAL CONSTRAINTS - DESIGN AND CONSTRUCTION (Figure S3.4), 3) NON-TECHNICAL CONSTRAINTS – OPERATION (Figure S3.5) and 4) TECHNICAL CONSTRAINTS – OPERATION (Figure S3.6). Where the user has to answer for all the events by writing an “X” on the risk category that they think it is the most adequate.

Only one “X” has to be written at each line, as the person filling the sheet must select one of the following four categories of risk: no risk, high risk, medium risk, or low risk. In the Input worksheet, there is a button of instructions; when this button is clicked, a pop-up text box is shown (which indicates the order that the four input sheets should be filled and some explanation about their meaning). In addition, each input sheet has its own instruction button, which explains the user by using text and images, how to fill the surveys from each input worksheet. Finally, when all the input sheets have been filled, the user can run the Results button in order to go the RESULTS sheet (or if the user need help, the Help button can bring him/her

to the Help sheet, or if the user wants to go back to the HOME sheet, he/she can press the BACK TO HOME button).

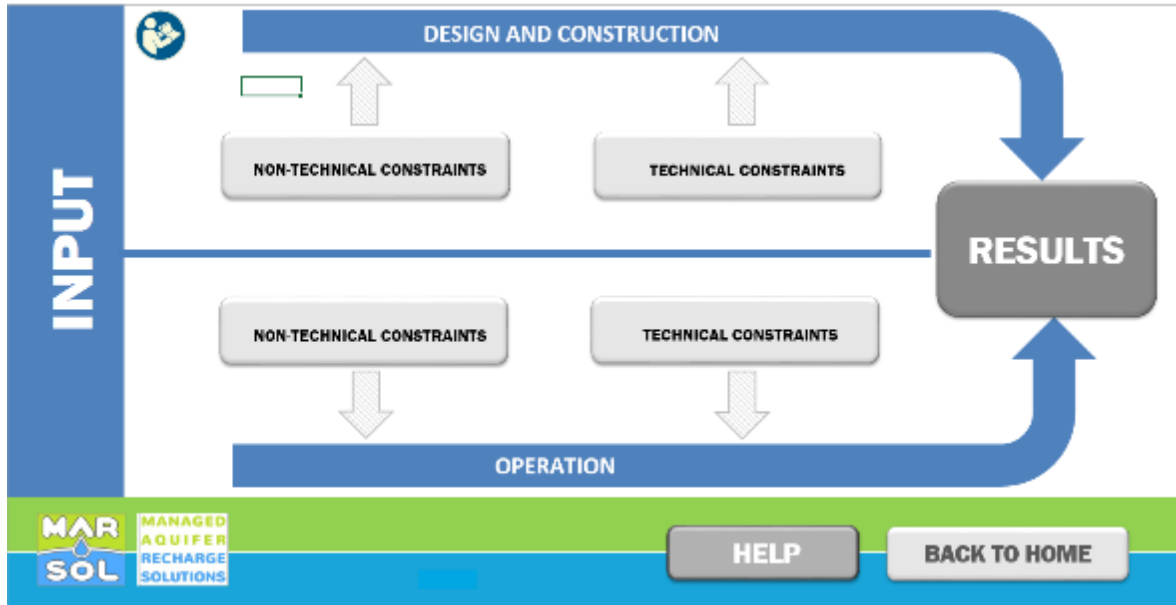

Figure S3.2. Input layout visualization

| DESIGN AND CONSTRUCTION OF A MAR FACILITY                         | RISK PERCEPTION |      |        |     |
|-------------------------------------------------------------------|-----------------|------|--------|-----|
|                                                                   | NO RISK         | HIGH | MEDIUM | LOW |
| <b>1. NON-TECHNICAL CONSTRAINTS</b>                               |                 |      |        |     |
| <b>1.1 Legal constraints</b>                                      |                 |      |        |     |
| 1.1.1 Territorial constraints                                     |                 |      |        |     |
| 1.1.1.1 European                                                  | X               |      |        |     |
| 1.1.1.2 National                                                  | X               |      |        |     |
| 1.1.1.3 Regional/Local                                            | X               |      |        |     |
| 1.1.2 Scope of legislation                                        |                 |      |        |     |
| 1.1.2.1 Health legislation                                        |                 |      |        | X   |
| 1.1.2.2 Others                                                    |                 |      |        | X   |
| <b>1.2 Economic constraints</b>                                   |                 |      |        |     |
| 1.2.1 Macroeconomic constraints                                   | X               |      |        |     |
| 1.2.2 Microeconomic constraints                                   |                 |      |        |     |
| 1.2.2.1 Not enough water to recharge due to other economical uses |                 |      |        |     |
| 1.2.2.1.1 Industrial use                                          | X               |      |        |     |
| 1.2.2.1.2 Agricultural use                                        | X               |      |        |     |
| 1.2.2.1.3 Domestic use                                            | X               |      |        |     |
| 1.2.2.2 Cost restriction                                          | X               |      |        |     |
| 1.2.2.2.1 Low price of water                                      |                 |      |        | X   |
| 1.2.2.2.2 High installation cost/maintenance requirements         |                 |      |        | X   |
| 1.2.2.2.3 Lack of private/public funding                          |                 |      |        | X   |
| <b>1.3 Social acceptance</b>                                      |                 |      |        |     |
| 1.3.1 Health risk perception                                      | X               |      |        |     |
| 1.3.2 High cost perception                                        |                 |      |        | X   |
| 1.3.3 Behavioral requirements                                     | X               |      |        |     |
| 1.3.4 Children surveillance                                       | X               |      |        |     |
| 1.3.5 Fair distribution of treated water                          | X               |      |        |     |
| 1.3.6 Perception of effectiveness                                 |                 | X    |        |     |
| <b>1.4 Governance</b>                                             |                 |      |        |     |
| 1.4.1 Lack of coordination                                        | X               |      |        |     |
| 1.4.2 Non-technical knowledge                                     | X               |      |        |     |

Figure S3.3. Non-technical constraints – Design and construction, sheet visualization.

| DESIGN AND CONSTRUCTION OF A MAR FACILITY                                       | RISK PERCEPTION |     |        |     |
|---------------------------------------------------------------------------------|-----------------|-----|--------|-----|
|                                                                                 | NO RISK         | LOW | MEDIUM | LOW |
| <b>2. TECHNICAL CONSTRAINTS</b>                                                 |                 |     |        |     |
| <b>2.1 Source water availability and right of access</b>                        |                 |     |        |     |
| 2.1.1 Low quality input water                                                   |                 |     |        |     |
| 2.1.1.1 Sanitary/biological restrictions (e.g. due the pathogens)               | X               |     |        |     |
| 2.1.1.2 Physical restrictions                                                   |                 |     |        |     |
| 2.1.1.2.1 Turbidity/particles                                                   | X               |     |        |     |
| 2.1.1.3 Chemical restrictions                                                   |                 |     |        |     |
| 2.1.1.3.1 Metals (e.g. arsenic, manganese)                                      | X               |     |        |     |
| 2.1.1.3.2 Salinity and sodicity                                                 | X               |     |        |     |
| 2.1.1.3.3 Nutrients (nitrogen, phosphorous)                                     | X               |     |        |     |
| 2.1.1.3.4 Organic chemicals (pollutants, EDCs)                                  | X               |     |        |     |
| 2.1.1.3.5 Radionuclides                                                         | X               |     |        |     |
| <b>2.2 Water scarcity</b>                                                       |                 |     |        |     |
| 2.2.1 River regulation                                                          | X               |     |        |     |
| 2.2.2 Climate                                                                   |                 |     |        |     |
| 2.2.2.1 Droughts and Rainfall event periodicity                                 | X               |     |        |     |
| 2.2.3 Availability of water from waste water treatment plant                    | X               |     |        |     |
| 2.2.4 Availability of water from desalination plant                             |                 | X   |        |     |
| <b>2.3 Right of access</b>                                                      |                 |     |        |     |
| 2.3.1 Right of access                                                           | X               |     |        |     |
| <b>2.4 Hydrogeological assessment</b>                                           |                 |     |        |     |
| 2.4.1 Hydraulic properties                                                      |                 |     |        |     |
| 2.4.1.1 Risk of clogging                                                        |                 |     |        | X   |
| 2.4.1.2 Risk of low water storage                                               |                 |     | X      |     |
| 2.4.1.3 Risk of low infiltration rate                                           |                 |     |        | X   |
| 2.4.2 High thickness and not shallow aquifer                                    | X               |     |        |     |
| 2.4.3 Regional hydrogeology (does the regional balance allow the MAR facility?) | X               |     |        |     |
| <b>2.5 Lack of infrastructures</b>                                              |                 |     |        |     |
| 2.5.1 Lack of potential available land                                          | X               |     |        |     |
| 2.5.2 Lack of structure for capturing the water                                 | X               |     |        |     |
| 2.5.3 Lack of water pre-treatment infrastructures                               | X               |     |        |     |
| 2.5.4 Lack of recovery wells                                                    |                 |     | X      |     |

Figure S3.4. Technical constraints – Design and construction, sheet visualization.

| OPERATIONAL PROCESSES                                             | RISK PERCEPTION |     |        |     |
|-------------------------------------------------------------------|-----------------|-----|--------|-----|
|                                                                   | NO RISK         | LOW | MEDIUM | LOW |
| <b>1. NON-TECHNICAL CONSTRAINTS</b>                               |                 |     |        |     |
| <b>1.1 Legal constraints</b>                                      |                 |     |        |     |
| 1.1.1 Territorial constraints                                     |                 |     |        |     |
| 1.1.1.1 European                                                  | X               |     |        |     |
| 1.1.1.2 National                                                  | X               |     |        |     |
| 1.1.1.3 Regional/Local                                            | X               |     |        |     |
| 1.1.2 Scope of legislation                                        |                 |     |        |     |
| 1.1.2.1 Health legislation                                        | X               |     |        |     |
| 1.1.2.2 Others                                                    | X               |     |        |     |
| <b>1.2 Economic constraints</b>                                   |                 |     |        |     |
| 1.2.1 Macroeconomic constraints                                   | X               |     |        |     |
| 1.2.2 Microeconomic constraints                                   |                 |     |        |     |
| 1.2.2.1 Not enough water to recharge due to other economical uses |                 |     |        |     |
| 1.2.2.1.1 Industrial use                                          | X               |     |        |     |
| 1.2.2.1.2 Agricultural use                                        | X               |     |        |     |
| 1.2.2.1.3 Domestic use                                            |                 | X   |        |     |
| 1.2.2.2 Cost restriction                                          |                 |     |        |     |
| 1.2.2.2.1 Low price of water                                      | X               |     |        |     |
| 1.2.2.2.2 High installation cost                                  |                 |     | X      |     |
| 1.2.2.2.3 High maintenance cost/maintenance requirements          | X               |     |        |     |
| 1.2.2.3 Lack of private/public funding                            | X               |     |        |     |
| <b>1.3 Social unacceptance</b>                                    |                 |     |        |     |
| 1.3.1 Health risk perception                                      | X               |     |        |     |
| 1.3.2 High cost perception                                        |                 |     |        | X   |
| 1.3.3 Behavioral requirements                                     | X               |     |        |     |
| 1.3.4 Children surveillance                                       | X               |     |        |     |
| 1.3.5 Fair distribution of treated water                          | X               |     |        |     |
| 1.3.6 Perception of effectiveness                                 |                 |     |        | X   |
| <b>1.4 Governance</b>                                             |                 |     |        |     |
| 1.4.1 Lack of coordination                                        | X               |     |        |     |
| 1.4.2 Non-technical knowledge                                     |                 |     |        | X   |

Figure S3.5. Non-technical constraints – Operation, sheet visualization.



| OPERATIONAL PROCESSES                                                          | RISK PERCEPTION |      |        |     |
|--------------------------------------------------------------------------------|-----------------|------|--------|-----|
|                                                                                | NO RISK         | HIGH | MEDIUM | LOW |
| <b>2. TECHNICAL CONSTRAINTS</b>                                                |                 |      |        |     |
| <b>2.1 Structural Damages</b>                                                  |                 |      |        |     |
| 2.1.1 Flooding                                                                 |                 |      |        | X   |
| 2.1.2 Natural hazards (e.g. earthquake)                                        | X               |      |        |     |
| 2.1.3 Terrorism activities/Vandalism                                           |                 |      | X      |     |
| 2.1.4 Civil work failures                                                      |                 |      |        |     |
| 2.1.4.1 Slope stability                                                        |                 |      |        | X   |
| 2.1.4.2 Pipe breakage                                                          |                 |      |        | X   |
| 2.1.4.3 Others                                                                 |                 |      |        | X   |
| 2.1.5 Aquifer dissolution (e.g. in karstic aquifer)                            |                 |      |        | X   |
| <b>2.2 Not enough water recharged</b>                                          |                 |      |        |     |
| <b>2.2.1 Low quality water</b>                                                 |                 |      |        |     |
| 2.2.1.1 Sanitary/biological restrictions (e.g. due the pathogens)              | X               |      |        |     |
| 2.2.1.2 Physical restrictions                                                  |                 |      |        |     |
| 2.2.1.2.1 Turbidity/particles                                                  | X               |      |        |     |
| 2.2.1.3 Chemical restrictions                                                  |                 |      |        |     |
| 2.2.1.3.1 Metals (e.g. arsenic, manganese)                                     | X               |      |        |     |
| 2.2.1.3.2 Salinity and sodicity                                                | X               |      |        |     |
| 2.2.1.3.3 Nutrients (nitrogen, phosphorous)                                    | X               |      |        |     |
| 2.2.1.3.4 Organic chemicals (pollutants, EOCs)                                 | X               |      |        |     |
| 2.2.1.3.5 Radionuclides                                                        | X               |      |        |     |
| <b>2.2.2 Water scarcity</b>                                                    |                 |      |        |     |
| 2.2.2.1 Climate                                                                |                 |      |        |     |
| 2.2.2.1.1 Droughts and Rainfall event periodicity                              | X               |      |        |     |
| 2.2.2.2 Waste water treatment plant failure                                    | X               |      |        |     |
| 2.2.2.3 Desalination plant failure                                             | X               |      |        |     |
| 2.2.2.4 River regulation                                                       | X               |      |        |     |
| <b>2.2.3 Clogging</b>                                                          |                 |      |        |     |
| 2.2.3.1 Physical clogging                                                      |                 |      |        |     |
| 2.2.3.1.1 Failure deposition pond (particles from diverted water)              |                 |      |        |     |
| 2.2.3.1.1.1 Pipe filter fails                                                  | X               |      |        |     |
| 2.2.3.1.1.2 Residence time                                                     | X               |      |        |     |
| 2.2.3.1.2 Source fine particles (generation inside MAR facility)               | X               |      |        |     |
| 2.2.3.1.3 Transport sedimentation (erosion or deposition from recharge pond)   |                 |      |        |     |
| 2.2.3.1.3.1 Residence time                                                     | X               |      |        |     |
| 2.2.3.1.3.2 Source fine particles (generation inside MAR facility)             | X               |      |        |     |
| 2.2.3.1.3.3 Transport sedimentation (erosion or deposition from recharge pond) |                 |      |        |     |
| 2.2.3.1.3.3.1 Deposition                                                       | X               |      |        |     |
| 2.2.3.1.3.3.2 Erosion                                                          | X               |      |        |     |
| 2.2.3.2 Bioclogging                                                            | X               |      |        |     |
| 2.2.3.3 Chemical clogging                                                      |                 |      |        |     |
| 2.2.3.3.1 Evaporation (excess)                                                 | X               |      |        |     |
| 2.2.3.3.2 Water mixtures                                                       | X               |      |        |     |
| 2.2.3.3.3 Microbial population catalysis                                       | X               |      |        |     |
| 2.2.3.4 Compaction                                                             |                 |      |        | X   |
| 2.2.3.5 Generation of gas (e.g. bubble formation)                              |                 |      |        |     |
| 2.2.3.5.1 Physical Motives                                                     | X               |      |        |     |
| 2.2.3.5.2 Bacterial processes                                                  | X               |      |        |     |
| 2.2.3.5.3 Inappropriate design                                                 | X               |      |        |     |
| <b>2.3 Unacceptable quality of water at sensitive location</b>                 |                 |      |        |     |
| <b>2.3.1 Inefficient natural attenuation</b>                                   |                 |      |        |     |
| 2.3.1.1 Organic matter                                                         | X               |      |        |     |
| 2.3.1.2 Emerging organic compounds                                             | X               |      |        |     |
| 2.3.1.3 Nutrients                                                              | X               |      |        |     |
| <b>2.3.2 Generation of metabolites</b>                                         |                 |      |        |     |
| 2.3.2.1 Nitrogen cycle (NO <sub>2</sub> <sup>-</sup> , N <sub>2</sub> O...)    | X               |      |        |     |
| 2.3.2.2 Emerging organic compounds                                             |                 |      |        | X   |
| 2.3.2.3 Other nutrient cycles (H <sub>2</sub> S)                               | X               |      |        |     |
| <b>2.3.3 Mobilization</b>                                                      |                 |      |        |     |
| 2.3.3.1 Metals                                                                 | X               |      |        |     |
| <b>2.4 Specific targets (is it important to you?)</b>                          |                 |      |        |     |
| 2.4.1 Seawater barriers                                                        | X               |      |        |     |
| 2.4.2 Protected water body                                                     | X               |      |        |     |
| <b>2.4.3 Water levels</b>                                                      |                 |      |        |     |
| 2.4.3.1 River                                                                  | X               |      |        |     |
| 2.4.3.2 Spring                                                                 | X               |      |        |     |
| 2.4.3.3 Wetland                                                                | X               |      |        |     |
| 2.4.3.4 Groundwater                                                            | X               |      |        |     |

Figure S3.6. Technical constraints – Operation, sheet visualization.

The third step is RESULTS. This part shows the user the numerical results of the risk assessment (Figure S3.8). The risk assessment is calculated within the same Results sheet by applying the values present in the A PRIORI CRITERIA sheet (Figure S3.7) which are chosen depending on the risk category selected from the INPUT step. Note that the a priori criteria are site dependent. For that, the MAR facility managerd must define each a priori criteria based on their knowledge about the site and its particular

idiosyncrasies. As a default, A PRIORI CRITERIA values are provided in MAR-RISKAPP based on experience from a number of sites worldwide. The a priori values are probability numbers (ranging in the interval [0-1] that indicate the probability (from a period of 2-6 years) that the MAR facility fails due to that particular individual event.

| DESIGN AND CONSTRUCTION OF A MAR FACILITY                                      | HIGH | MEDIUM | LOW    | OPERATIONAL PROCESSES                                                          | HIGH    | MEDIUM  | LOW       |
|--------------------------------------------------------------------------------|------|--------|--------|--------------------------------------------------------------------------------|---------|---------|-----------|
| <b>1. NON-TECHNICAL CONSTRAINTS</b>                                            |      |        |        | <b>1. NON-TECHNICAL CONSTRAINTS</b>                                            |         |         |           |
| <b>1.1. Geographical constraints</b>                                           |      |        |        | <b>1.1. Geographical constraints</b>                                           |         |         |           |
| 1.1.1 Territorial constraints                                                  |      |        |        | 1.1.1 Territorial constraints                                                  |         |         |           |
| 1.1.1.1 European                                                               | 0.5  | 0.3    | 0.1    | 1.1.1.1 European                                                               | 0.25    | 0.15    | 0.05      |
| 1.1.1.2 National                                                               | 0.5  | 0.3    | 0.1    | 1.1.1.2 National                                                               | 0.25    | 0.15    | 0.05      |
| 1.1.1.3 Regional/Local                                                         | 0.5  | 0.3    | 0.1    | 1.1.1.3 Regional/Local                                                         | 0.25    | 0.15    | 0.05      |
| 1.1.2 Scope of legislation                                                     |      |        |        | 1.1.2 Scope of legislation                                                     |         |         |           |
| 1.1.2.1 Health legislation                                                     | 0.5  | 0.3    | 0.1    | 1.1.2.1 Health legislation                                                     | 0.25    | 0.15    | 0.05      |
| 1.1.2.2 Others                                                                 | 0.5  | 0.3    | 0.1    | 1.1.2.2 Others                                                                 | 0.25    | 0.15    | 0.05      |
| <b>1.2. Socio-economic constraints</b>                                         |      |        |        | <b>1.2. Socio-economic constraints</b>                                         |         |         |           |
| 1.2.1 Macroeconomic constraints                                                | 0.4  | 0.1    | 0.05   | 1.2.1 Macroeconomic constraints                                                | 0.4     | 0.1     | 0.05      |
| 1.2.2 Microeconomic constraints                                                |      |        |        | 1.2.2 Microeconomic constraints                                                |         |         |           |
| 1.2.2.1 Not enough water to recharge due to other economical uses              | 0.2  | 0.05   | 0.01   | 1.2.2.1 Not enough water to recharge due to other economical uses              | 0.2     | 0.05    | 0.01      |
| 1.2.2.1.1 Industrial use                                                       | 0.2  | 0.05   | 0.01   | 1.2.2.1.1 Industrial use                                                       | 0.2     | 0.05    | 0.01      |
| 1.2.2.1.2 Agricultural use                                                     | 0.2  | 0.05   | 0.01   | 1.2.2.1.2 Agricultural use                                                     | 0.2     | 0.05    | 0.01      |
| 1.2.2.1.3 Domestic use                                                         | 0.2  | 0.05   | 0.01   | 1.2.2.1.3 Domestic use                                                         | 0.2     | 0.05    | 0.01      |
| 1.2.2.2 Cost restriction                                                       |      |        |        | 1.2.2.2 Cost restriction                                                       |         |         |           |
| 1.2.2.2.1 Low price of water                                                   | 0.2  | 0.05   | 0.01   | 1.2.2.2.1 Low price of water                                                   | 0.02    | 0.005   | 0.001     |
| 1.2.2.2.2 High installation cost                                               | 0.2  | 0.05   | 0.01   | 1.2.2.2.2 High installation cost                                               | 0.02    | 0.005   | 0.001     |
| 1.2.2.2.3 High maintenance cost/maintenance requirements                       | 0.2  | 0.05   | 0.01   | 1.2.2.2.3 High maintenance cost/maintenance requirements                       | 0.2     | 0.05    | 0.01      |
| 1.2.2.3 Lack of private/public funding                                         | 0.4  | 0.1    | 0.05   | 1.2.2.3 Lack of private/public funding                                         | 0.4     | 0.1     | 0.05      |
| <b>1.3. Social perception</b>                                                  |      |        |        | <b>1.3. Social perception</b>                                                  |         |         |           |
| 1.3.1 Health risk perception                                                   | 0.2  | 0.05   | 0.01   | 1.3.1 Health risk perception                                                   | 0.3     | 0.1     | 0.05      |
| 1.3.2 High cost perception                                                     | 0.2  | 0.05   | 0.01   | 1.3.2 High cost perception                                                     | 0.3     | 0.1     | 0.05      |
| 1.3.3 Behavioral requirements                                                  | 0.2  | 0.05   | 0.01   | 1.3.3 Behavioral requirements                                                  | 0.3     | 0.1     | 0.05      |
| 1.3.4 Children surveillance                                                    | 0.2  | 0.05   | 0.01   | 1.3.4 Children surveillance                                                    | 0.3     | 0.1     | 0.05      |
| 1.3.5 Fair distribution of treated water                                       | 0.2  | 0.05   | 0.01   | 1.3.5 Fair distribution of treated water                                       | 0.3     | 0.1     | 0.05      |
| 1.3.6 Perception of effectiveness                                              | 0.2  | 0.05   | 0.01   | 1.3.6 Perception of effectiveness                                              | 0.3     | 0.1     | 0.05      |
| <b>1.4. Knowledge</b>                                                          |      |        |        | <b>1.4. Knowledge</b>                                                          |         |         |           |
| 1.4.1 Lack of expedition                                                       | 0.4  | 0.1    | 0.05   | 1.4.1 Lack of expedition                                                       | 0.4     | 0.1     | 0.05      |
| 1.4.2 Non-technical knowledge                                                  | 0.4  | 0.1    | 0.05   | 1.4.2 Non-technical knowledge                                                  | 0.4     | 0.1     | 0.05      |
| <b>2. TECHNICAL CONSTRAINTS</b>                                                |      |        |        | <b>2. TECHNICAL CONSTRAINTS</b>                                                |         |         |           |
| <b>2.1. Low quality input water (if YES continue)</b>                          |      |        |        | <b>2.1. Low quality input water (if YES continue)</b>                          |         |         |           |
| 2.1.1 Sanitary/biological restrictions (e.g. due the pathogens)                | 0.3  | 0.1    | 0.05   | 2.1.1 Sanitary/biological restrictions (e.g. due the pathogens)                | 0.2     | 0.05    | 0.01      |
| 2.1.1.1 Turbidity/particles                                                    | 0.4  | 0.1    | 0.05   | 2.1.1.1 Turbidity/particles                                                    | 0.00001 | 0.00001 | 0.0000001 |
| 2.1.1.2 Chemical restrictions (if YES continue)                                |      |        |        | 2.1.1.2 Chemical restrictions (if YES continue)                                |         |         |           |
| 2.1.1.2.1 Metals (e.g. arsenic, manganese)                                     | 0.2  | 0.05   | 0.01   | 2.1.1.2.1 Metals (e.g. arsenic, manganese)                                     | 0.2     | 0.1     | 0.05      |
| 2.1.1.2.2 Salinity and sodicity                                                | 0.2  | 0.05   | 0.01   | 2.1.1.2.2 Salinity and sodicity                                                | 0.1     | 0.05    | 0.01      |
| 2.1.1.2.3 Nutrients (nitrogen, phosphorous)                                    | 0.2  | 0.05   | 0.01   | 2.1.1.2.3 Nutrients (nitrogen, phosphorous)                                    | 0.001   | 0.0001  | 0.00001   |
| 2.1.1.2.4 Organic chemicals (pollutants, DOC)                                  | 0.2  | 0.05   | 0.01   | 2.1.1.2.4 Organic chemicals (pollutants, DOC)                                  | 0.001   | 0.0001  | 0.00001   |
| 2.1.1.5 Radionuclides                                                          | 0.01 | 0.0001 | 0      | 2.1.1.5 Radionuclides                                                          | 0.3     | 0.1     | 0.05      |
| 2.1.2 Water scarcity (if YES continue)                                         |      |        |        | 2.1.2 Water scarcity (if YES continue)                                         |         |         |           |
| 2.1.2.1 River regulation                                                       | 0.5  | 0.2    | 0.05   | 2.1.2.1 River regulation                                                       | 0.4     | 0.2     | 0.05      |
| 2.1.2.2 Climate (if YES continue)                                              |      |        |        | 2.1.2.2 Climate (if YES continue)                                              |         |         |           |
| 2.1.2.2.1 Droughts                                                             | 0.5  | 0.2    | 0.05   | 2.1.2.2.1 Droughts                                                             | 0.3     | 0.2     | 0.05      |
| 2.1.2.3 Availability of water from waste water treatment plant                 | 0.5  | 0.2    | 0.05   | 2.1.2.3 Availability of water from waste water treatment plant                 | 0.5     | 0.2     | 0.05      |
| 2.1.2.4 Availability of water from desalination plant                          | 0.5  | 0.2    | 0.05   | 2.1.2.4 Availability of water from desalination plant                          | 0.5     | 0.2     | 0.05      |
| 2.1.3 Right of access                                                          | 0.5  | 0.2    | 0.05   | 2.1.3 Right of access                                                          | 0.2     | 0.05    | 0.01      |
| <b>2.2. Hydrogeological constraints (if YES continue)</b>                      |      |        |        | <b>2.2. Hydrogeological constraints (if YES continue)</b>                      |         |         |           |
| 2.2.1 Hydraulic properties                                                     |      |        |        | 2.2.1 Hydraulic properties                                                     |         |         |           |
| 2.2.1.1 Risk of clogging                                                       | 0.4  | 0.1    | 0.05   | 2.2.1.1 Risk of clogging                                                       | 0.4     | 0.1     | 0.05      |
| 2.2.1.2 Risk of low water storage                                              | 0.4  | 0.1    | 0.05   | 2.2.1.2 Risk of low water storage                                              | 0.4     | 0.1     | 0.05      |
| 2.2.1.3 Risk of low infiltration rate                                          | 0.4  | 0.1    | 0.05   | 2.2.1.3 Risk of low infiltration rate                                          | 0.4     | 0.1     | 0.05      |
| 2.2.2 High thickness and not shallow aquifer                                   | 0.4  | 0.1    | 0.05   | 2.2.2 High thickness and not shallow aquifer                                   | 0.5     | 0.2     | 0.05      |
| 2.2.3 Regional hydrogeology (does the regional balance allow the MAR facility) | 0.4  | 0.1    | 0.05   | 2.2.3 Regional hydrogeology (does the regional balance allow the MAR facility) | 0.5     | 0.2     | 0.05      |
| <b>2.3. Lack of infrastructure</b>                                             |      |        |        | <b>2.3. Lack of infrastructure</b>                                             |         |         |           |
| 2.3.1 Lack of potential available land                                         | 0.5  | 0.2    | 0.1    | 2.3.1 Lack of potential available land                                         | 0.5     | 0.2     | 0.1       |
| 2.3.2 Lack of structure for capturing the water                                | 0.1  | 0.005  | 0.0001 | 2.3.2 Lack of structure for capturing the water                                | 0.4     | 0.1     | 0.05      |
| 2.3.3 Lack of water pre-treatment infrastructures                              | 0.1  | 0.005  | 0.0001 | 2.3.3 Lack of water pre-treatment infrastructures                              | 0.4     | 0.1     | 0.05      |
| 2.3.4 Lack of recovery wells                                                   | 0.1  | 0.005  | 0.0001 | 2.3.4 Lack of recovery wells                                                   | 0.4     | 0.1     | 0.05      |
|                                                                                |      |        |        | <b>2.4. Specific targets (if YES continue)</b>                                 |         |         |           |
|                                                                                |      |        |        | 2.4.1 Seawater barriers                                                        | 0.01    | 0.001   | 0.0001    |
|                                                                                |      |        |        | 2.4.2 Protected water body                                                     | 0.01    | 0.001   | 0.0001    |
|                                                                                |      |        |        | 2.4.3 Water levels (if YES continue)                                           | 0.01    | 0.001   | 0.0001    |
|                                                                                |      |        |        | 2.4.3.1 River                                                                  | 0.01    | 0.001   | 0.0001    |
|                                                                                |      |        |        | 2.4.3.2 Spring                                                                 | 0.01    | 0.001   | 0.0001    |
|                                                                                |      |        |        | 2.4.3.3 Wetland                                                                | 0.01    | 0.001   | 0.0001    |
|                                                                                |      |        |        | 2.4.3.4 Groundwater                                                            | 0.01    | 0.001   | 0.0001    |

Figure S3.7. Expert Criteria values for the Llobregat site.

The initial prior values are presented in the DEFAULT VALUE column, and are blocked to changes by the user. Next to this column, there is the CATEGORY DEFAULT VALUES column, which indicates the risk category that the user selected in the INPUT sheets. There is also a third column called USER VALUES, that can be modified by the user in order to change the specific risk values (from the DEFAULT VALUES column) if the user has better data than the default calculations for a specific study site (but does not want to change the a priori criteria values). This third column is the one that will be used in the following calculations, so the user has to be fully aware that its modification has direct consequences on the results. The tool indicates the user if these USER VALUES have been modified or not from the default ones (this is done by filling the USER VALUES cells with red color, to indicate that both columns have the same values). Similarly, to the other steps, a HELP button can be found, and also some instructions pop-up (Figure S3.9) if the instructions button is clicked. The user can change some data from the INPUT by clicking the BACK TO INPUT button. If everything is correct, the user can go to the next step by clicking the GRAPHICAL RESULTS button.

**PAY ATTENTION!!!**  
These results are calculated considering a preliminary criteria of risk decided by developers and considering their own experience in a Mediterranean MAR facility.  
These criteria have to be adapted to technical and socio-economic differences of each site.

| DESIGN AND CONSTRUCTION OF A MAR FACILITY |                |             | OPERATIONAL PROCESSES               |                |             |
|-------------------------------------------|----------------|-------------|-------------------------------------|----------------|-------------|
| TECHNICAL CRITERIA                        | DEFAULT VALUES | USER VALUES | TECHNICAL CRITERIA                  | DEFAULT VALUES | USER VALUES |
| <b>1. NON-TECHNICAL CONSTRAINTS</b>       |                |             | <b>1. NON-TECHNICAL CONSTRAINTS</b> |                |             |
| 1.1.1 Construction                        | 0.50           | 0.50        | 1.1.1 Construction                  | 0.00           | 0.00        |
| 1.1.2 Operation                           | 0.50           | 0.50        | 1.1.2 Operation                     | 0.00           | 0.00        |
| 1.1.3 Maintenance                         | 0.50           | 0.50        | 1.1.3 Maintenance                   | 0.00           | 0.00        |
| 1.1.4 Decommission                        | 0.50           | 0.50        | 1.1.4 Decommission                  | 0.00           | 0.00        |
| 1.1.5 Environmental                       | 0.50           | 0.50        | 1.1.5 Environmental                 | 0.00           | 0.00        |
| 1.1.6 Regulatory                          | 0.50           | 0.50        | 1.1.6 Regulatory                    | 0.00           | 0.00        |
| 1.1.7 Health protection                   | 0.50           | 0.50        | 1.1.7 Health protection             | 0.00           | 0.00        |
| 1.1.8 Other                               | 0.50           | 0.50        | 1.1.8 Other                         | 0.00           | 0.00        |
| 1.2.1 Phytosanitary (injection)           | 0.50           | 0.50        | 1.2.1 Phytosanitary (injection)     | 0.00           | 0.00        |
| 1.2.2 Phytosanitary (recovery)            | 0.50           | 0.50        | 1.2.2 Phytosanitary (recovery)      | 0.00           | 0.00        |
| 1.2.3 Phytosanitary (storage)             | 0.50           | 0.50        | 1.2.3 Phytosanitary (storage)       | 0.00           | 0.00        |
| 1.2.4 Phytosanitary (distribution)        | 0.50           | 0.50        | 1.2.4 Phytosanitary (distribution)  | 0.00           | 0.00        |
| 1.2.5 Phytosanitary (wastewater)          | 0.50           | 0.50        | 1.2.5 Phytosanitary (wastewater)    | 0.00           | 0.00        |
| 1.2.6 Phytosanitary (other)               | 0.50           | 0.50        | 1.2.6 Phytosanitary (other)         | 0.00           | 0.00        |
| 1.2.7 Phytosanitary (total)               | 0.50           | 0.50        | 1.2.7 Phytosanitary (total)         | 0.00           | 0.00        |
| 1.2.8 Phytosanitary (other)               | 0.50           | 0.50        | 1.2.8 Phytosanitary (other)         | 0.00           | 0.00        |
| 1.2.9 Phytosanitary (total)               | 0.50           | 0.50        | 1.2.9 Phytosanitary (total)         | 0.00           | 0.00        |
| 1.2.10 Phytosanitary (total)              | 0.50           | 0.50        | 1.2.10 Phytosanitary (total)        | 0.00           | 0.00        |
| 1.2.11 Phytosanitary (total)              | 0.50           | 0.50        | 1.2.11 Phytosanitary (total)        | 0.00           | 0.00        |
| 1.2.12 Phytosanitary (total)              | 0.50           | 0.50        | 1.2.12 Phytosanitary (total)        | 0.00           | 0.00        |
| 1.2.13 Phytosanitary (total)              | 0.50           | 0.50        | 1.2.13 Phytosanitary (total)        | 0.00           | 0.00        |
| 1.2.14 Phytosanitary (total)              | 0.50           | 0.50        | 1.2.14 Phytosanitary (total)        | 0.00           | 0.00        |
| 1.2.15 Phytosanitary (total)              | 0.50           | 0.50        | 1.2.15 Phytosanitary (total)        | 0.00           | 0.00        |
| 1.2.16 Phytosanitary (total)              | 0.50           | 0.50        | 1.2.16 Phytosanitary (total)        | 0.00           | 0.00        |
| 1.2.17 Phytosanitary (total)              | 0.50           | 0.50        | 1.2.17 Phytosanitary (total)        | 0.00           | 0.00        |
| 1.2.18 Phytosanitary (total)              | 0.50           | 0.50        | 1.2.18 Phytosanitary (total)        | 0.00           | 0.00        |
| 1.2.19 Phytosanitary (total)              | 0.50           | 0.50        | 1.2.19 Phytosanitary (total)        | 0.00           | 0.00        |
| 1.2.20 Phytosanitary (total)              | 0.50           | 0.50        | 1.2.20 Phytosanitary (total)        | 0.00           | 0.00        |
| 1.2.21 Phytosanitary (total)              | 0.50           | 0.50        | 1.2.21 Phytosanitary (total)        | 0.00           | 0.00        |
| 1.2.22 Phytosanitary (total)              | 0.50           | 0.50        | 1.2.22 Phytosanitary (total)        | 0.00           | 0.00        |
| 1.2.23 Phytosanitary (total)              | 0.50           | 0.50        | 1.2.23 Phytosanitary (total)        | 0.00           | 0.00        |
| 1.2.24 Phytosanitary (total)              | 0.50           | 0.50        | 1.2.24 Phytosanitary (total)        | 0.00           | 0.00        |
| 1.2.25 Phytosanitary (total)              | 0.50           | 0.50        | 1.2.25 Phytosanitary (total)        | 0.00           | 0.00        |
| 1.2.26 Phytosanitary (total)              | 0.50           | 0.50        | 1.2.26 Phytosanitary (total)        | 0.00           | 0.00        |
| 1.2.27 Phytosanitary (total)              | 0.50           | 0.50        | 1.2.27 Phytosanitary (total)        | 0.00           | 0.00        |
| 1.2.28 Phytosanitary (total)              | 0.50           | 0.50        | 1.2.28 Phytosanitary (total)        | 0.00           | 0.00        |
| 1.2.29 Phytosanitary (total)              | 0.50           | 0.50        | 1.2.29 Phytosanitary (total)        | 0.00           | 0.00        |
| 1.2.30 Phytosanitary (total)              | 0.50           | 0.50        | 1.2.30 Phytosanitary (total)        | 0.00           | 0.00        |
| 1.2.31 Phytosanitary (total)              | 0.50           | 0.50        | 1.2.31 Phytosanitary (total)        | 0.00           | 0.00        |
| 1.2.32 Phytosanitary (total)              | 0.50           | 0.50        | 1.2.32 Phytosanitary (total)        | 0.00           | 0.00        |
| 1.2.33 Phytosanitary (total)              | 0.50           | 0.50        | 1.2.33 Phytosanitary (total)        | 0.00           | 0.00        |
| 1.2.34 Phytosanitary (total)              | 0.50           | 0.50        | 1.2.34 Phytosanitary (total)        | 0.00           | 0.00        |
| 1.2.35 Phytosanitary (total)              | 0.50           | 0.50        | 1.2.35 Phytosanitary (total)        | 0.00           | 0.00        |
| 1.2.36 Phytosanitary (total)              | 0.50           | 0.50        | 1.2.36 Phytosanitary (total)        | 0.00           | 0.00        |
| 1.2.37 Phytosanitary (total)              | 0.50           | 0.50        | 1.2.37 Phytosanitary (total)        | 0.00           | 0.00        |
| 1.2.38 Phytosanitary (total)              | 0.50           | 0.50        | 1.2.38 Phytosanitary (total)        | 0.00           | 0.00        |
| 1.2.39 Phytosanitary (total)              | 0.50           | 0.50        | 1.2.39 Phytosanitary (total)        | 0.00           | 0.00        |
| 1.2.40 Phytosanitary (total)              | 0.50           | 0.50        | 1.2.40 Phytosanitary (total)        | 0.00           | 0.00        |
| 1.2.41 Phytosanitary (total)              | 0.50           | 0.50        | 1.2.41 Phytosanitary (total)        | 0.00           | 0.00        |
| 1.2.42 Phytosanitary (total)              | 0.50           | 0.50        | 1.2.42 Phytosanitary (total)        | 0.00           | 0.00        |
| 1.2.43 Phytosanitary (total)              | 0.50           | 0.50        | 1.2.43 Phytosanitary (total)        | 0.00           | 0.00        |
| 1.2.44 Phytosanitary (total)              | 0.50           | 0.50        | 1.2.44 Phytosanitary (total)        | 0.00           | 0.00        |
| 1.2.45 Phytosanitary (total)              | 0.50           | 0.50        | 1.2.45 Phytosanitary (total)        | 0.00           | 0.00        |
| 1.2.46 Phytosanitary (total)              | 0.50           | 0.50        | 1.2.46 Phytosanitary (total)        | 0.00           | 0.00        |
| 1.2.47 Phytosanitary (total)              | 0.50           | 0.50        | 1.2.47 Phytosanitary (total)        | 0.00           | 0.00        |
| 1.2.48 Phytosanitary (total)              | 0.50           | 0.50        | 1.2.48 Phytosanitary (total)        | 0.00           | 0.00        |
| 1.2.49 Phytosanitary (total)              | 0.50           | 0.50        | 1.2.49 Phytosanitary (total)        | 0.00           | 0.00        |
| 1.2.50 Phytosanitary (total)              | 0.50           | 0.50        | 1.2.50 Phytosanitary (total)        | 0.00           | 0.00        |
| 1.2.51 Phytosanitary (total)              | 0.50           | 0.50        | 1.2.51 Phytosanitary (total)        | 0.00           | 0.00        |
| 1.2.52 Phytosanitary (total)              | 0.50           | 0.50        | 1.2.52 Phytosanitary (total)        | 0.00           | 0.00        |
| 1.2.53 Phytosanitary (total)              | 0.50           | 0.50        | 1.2.53 Phytosanitary (total)        | 0.00           | 0.00        |
| 1.2.54 Phytosanitary (total)              | 0.50           | 0.50        | 1.2.54 Phytosanitary (total)        | 0.00           | 0.00        |
| 1.2.55 Phytosanitary (total)              | 0.50           | 0.50        | 1.2.55 Phytosanitary (total)        | 0.00           | 0.00        |
| 1.2.56 Phytosanitary (total)              | 0.50           | 0.50        | 1.2.56 Phytosanitary (total)        | 0.00           | 0.00        |
| 1.2.57 Phytosanitary (total)              | 0.50           | 0.50        | 1.2.57 Phytosanitary (total)        | 0.00           | 0.00        |
| 1.2.58 Phytosanitary (total)              | 0.50           | 0.50        | 1.2.58 Phytosanitary (total)        | 0.00           | 0.00        |
| 1.2.59 Phytosanitary (total)              | 0.50           | 0.50        | 1.2.59 Phytosanitary (total)        | 0.00           | 0.00        |
| 1.2.60 Phytosanitary (total)              | 0.50           | 0.50        | 1.2.60 Phytosanitary (total)        | 0.00           | 0.00        |
| 1.2.61 Phytosanitary (total)              | 0.50           | 0.50        | 1.2.61 Phytosanitary (total)        | 0.00           | 0.00        |
| 1.2.62 Phytosanitary (total)              | 0.50           | 0.50        | 1.2.62 Phytosanitary (total)        | 0.00           | 0.00        |
| 1.2.63 Phytosanitary (total)              | 0.50           | 0.50        | 1.2.63 Phytosanitary (total)        | 0.00           | 0.00        |
| 1.2.64 Phytosanitary (total)              | 0.50           | 0.50        | 1.2.64 Phytosanitary (total)        | 0.00           | 0.00        |
| 1.2.65 Phytosanitary (total)              | 0.50           | 0.50        | 1.2.65 Phytosanitary (total)        | 0.00           | 0.00        |
| 1.2.66 Phytosanitary (total)              | 0.50           | 0.50        | 1.2.66 Phytosanitary (total)        | 0.00           | 0.00        |
| 1.2.67 Phytosanitary (total)              | 0.50           | 0.50        | 1.2.67 Phytosanitary (total)        | 0.00           | 0.00        |
| 1.2.68 Phytosanitary (total)              | 0.50           | 0.50        | 1.2.68 Phytosanitary (total)        | 0.00           | 0.00        |
| 1.2.69 Phytosanitary (total)              | 0.50           | 0.50        | 1.2.69 Phytosanitary (total)        | 0.00           | 0.00        |
| 1.2.70 Phytosanitary (total)              | 0.50           | 0.50        | 1.2.70 Phytosanitary (total)        | 0.00           | 0.00        |

Figure S3.8. Results (upper part) sheet visualization.

| OPERATIONAL PROCESSES     | HIGH RISK TABLES | MEDIUM RISK TABLES | LOW RISK TABLES |
|---------------------------|------------------|--------------------|-----------------|
| NON-TECHNICAL CONSTRAINTS | 6/20/0           | 0/0/0              | 0/0/0           |
| Design activities         | 0/0/0            | 0/0/0              | 0/0/0           |
| Construction activities   | 0/0/0            | 0/0/0              | 0/0/0           |
| Operation                 | 0/0/0            | 0/0/0              | 0/0/0           |
| Decommissioning           | 0/0/0            | 0/0/0              | 0/0/0           |

Figure S3.9. Results (bottom part) sheet visualization.

The fourth step of the MAR-RISKAPP is the graphical results (Figure S3.10), displaying the numerical results shown in the previous step into graphs and tables. This step is divided into four points: 1) Operational pivot-table results (Figure S3.11), 2) Design and construction pivot-table results (Figure S3.12), 3) Operational fault tree (Figure S3.13) and 4) Design and construction fault tree (Figure S3.14). As in the other steps, there is a button with instructions, only if the user needs some help or orientation with the results from this step. For both pivot-tables, the results are structured in four categories of risk (high, medium, low, and no-risk). Inside each category, risk values are displayed in decreasing order (from high to low risk values). Also, both pivot-tables have a button to go back to the graphical results main sheet. For both fault trees, each point from the survey is presented by using a rectangle. For each point, risk value is showed on the bottom-left part of the rectangle and also is coloured according to risk categories. Finally, both fault-trees have a button to go back to the graphical results main sheet and a button to print the fault tree in a PDF file.

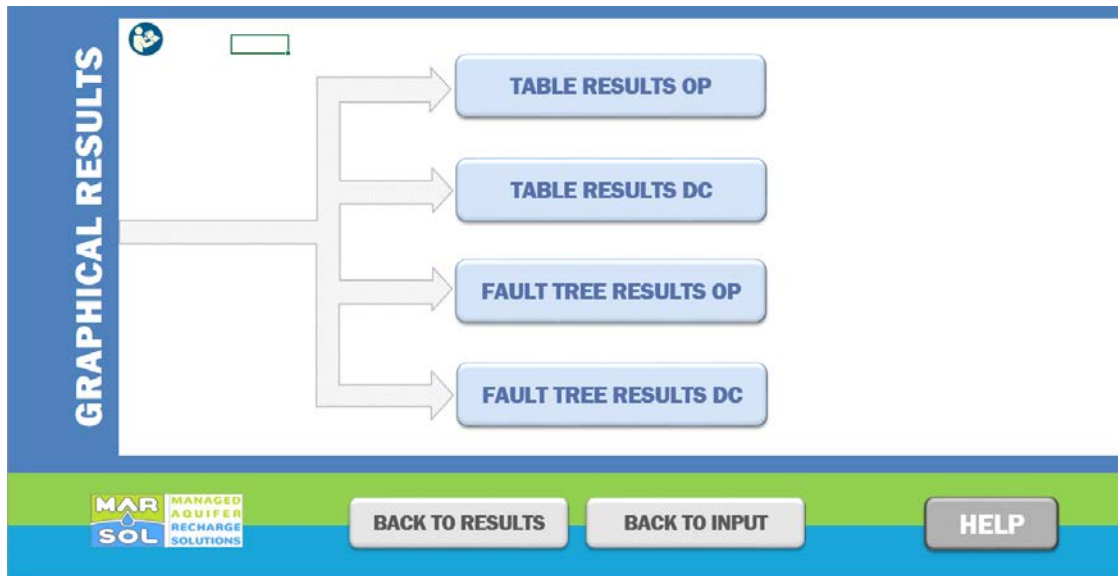

Figure S3.10. Graphical results sheet visualization.

BACK TO GRAPHICAL RESULTS

MAR SOL MANAGED AQUIFER RECHARGE SOLUTIONS

RISK PERCEPTION vs CALCULATED FAILURE RISK

| HIGH RISK                                                                   |          |
|-----------------------------------------------------------------------------|----------|
| 2.2.3.1.2 Source fine particles (generation inside MAR facility)            | 4.00E-01 |
| 1.4.1 Lack of coordination                                                  | 4.00E-01 |
| 2.2.1.2.1 Turbidity/particles                                               | 4.00E-01 |
| 1.3.4 Children surveillance                                                 | 3.00E-01 |
| 1.3.5 Fair distribution of treated water                                    | 3.00E-01 |
| 2.2.3.2 Bioclogging                                                         | 1.00E-01 |
| MEDIUM RISK                                                                 |          |
| 1.3.2 High cost perception                                                  | 1.00E-01 |
| 1.2.2.3 Lack of private/public funding                                      | 1.00E-01 |
| 2.2.3.4 Compaction                                                          | 1.00E-01 |
| 1.3.6 Perception of effectiveness                                           | 1.00E-01 |
| 1.3.3 Behavioral requirements                                               | 1.00E-01 |
| 1.3.1 Health risk perception                                                | 1.00E-01 |
| 1.2.2.1.2 Agricultural use                                                  | 5.00E-02 |
| 2.2.1.3.4 Organic chemicals (pollutants, EOCs)                              | 5.00E-02 |
| 1.2.2.1.1 Industrial use                                                    | 5.00E-02 |
| 1.2.2.2.2 High installation cost                                            | 5.00E-03 |
| 1.2.2.2.1 Low price of water                                                | 5.00E-03 |
| LOW RISK                                                                    |          |
| 1.1.1.1 European                                                            | 5.00E-02 |
| 1.1.2.2 Others                                                              | 5.00E-02 |
| 2.1.3 Terrorism activities/Vandalism                                        | 5.00E-02 |
| 2.3.2.3 Other nutrient cycles (H2S)                                         | 5.00E-02 |
| 1.1.1.3 Regional/Local                                                      | 5.00E-02 |
| 2.3.2.2 Emerging organic compounds                                          | 5.00E-02 |
| 2.1.4.2 Pipe breakage                                                       | 5.00E-02 |
| 2.3.2.1 Nitrogen cycle (NO <sub>2</sub> <sup>-</sup> , N <sub>2</sub> O...) | 5.00E-02 |
| 1.2.1 Macroeconomic constraints                                             | 5.00E-02 |

Figure S3.11. Operational pivot-table results sheet visualization.

[BACK TO GRAPHICAL RESULTS](#)



**MANAGED  
AQUIFER  
RECHARGE  
SOLUTIONS**

**RISK PERCEPTION vs CALCULATED FAILURE RISK**

| = MEDIUM RISK                                                                   |          |
|---------------------------------------------------------------------------------|----------|
| 1.4.1 Lack of coordination                                                      | 1.00E-01 |
| 1.2.2.1 Low price of water                                                      | 5.00E-02 |
| = NO RISK                                                                       |          |
| 1.2.2.1.1 Industrial use                                                        | 0.00E+00 |
| 1.3.3 Behavioral requirements                                                   | 0.00E+00 |
| 2.1.2.1 Droughts and Rainfall event periodicity                                 | 0.00E+00 |
| 2.3.2 Lack of structure for capturing the water                                 | 0.00E+00 |
| 1.2.2.2.3 High maintenance cost/maintenance requirements                        | 0.00E+00 |
| 2.3.1 Lack of potential available land                                          | 0.00E+00 |
| 1.1.1.3 Regional/Local                                                          | 0.00E+00 |
| 2.2.3 Regional hydrogeology (does the regional balance allow the MAR facility?) | 0.00E+00 |
| 1.3.5 Fair distribution of treated water                                        | 0.00E+00 |
| 2.2 High thickness and not shallow aquifer                                      | 0.00E+00 |
| 1.3.1 Health risk perception                                                    | 0.00E+00 |
| 2.2.1.3 Risk of low infiltration rate                                           | 0.00E+00 |
| 1.2.2.1.3 Domestic use                                                          | 0.00E+00 |
| 2.2.1.2 Risk of low water storage                                               | 0.00E+00 |
| 1.1.2.2 Others                                                                  | 0.00E+00 |
| 2.2.1.1 Risk of clogging                                                        | 0.00E+00 |
| 1.1.1.1 European                                                                | 0.00E+00 |
| 2.1.3 Right of access                                                           | 0.00E+00 |
| 1.3.6 Perception of effectiveness                                               | 0.00E+00 |
| 2.1.2.4 Availability of water from desalination plant                           | 0.00E+00 |
| 1.3.4 Children surveillance                                                     | 0.00E+00 |

Figure S3.12. Design and construction pivot-table results sheet visualization.

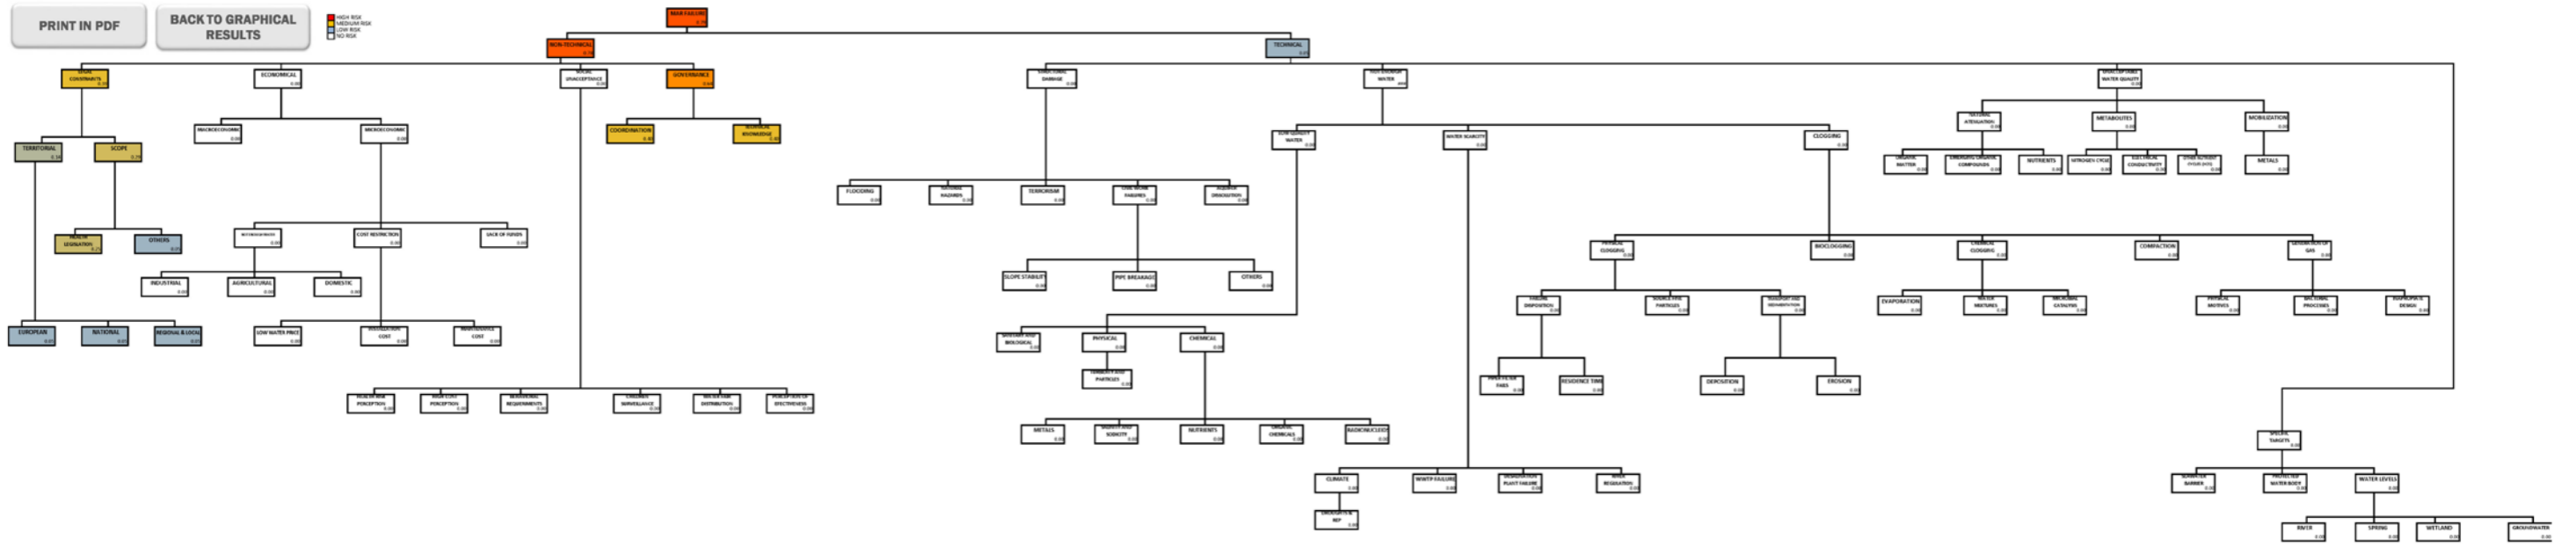

Figure S3.13. Operational fault-tree results sheet visualization.

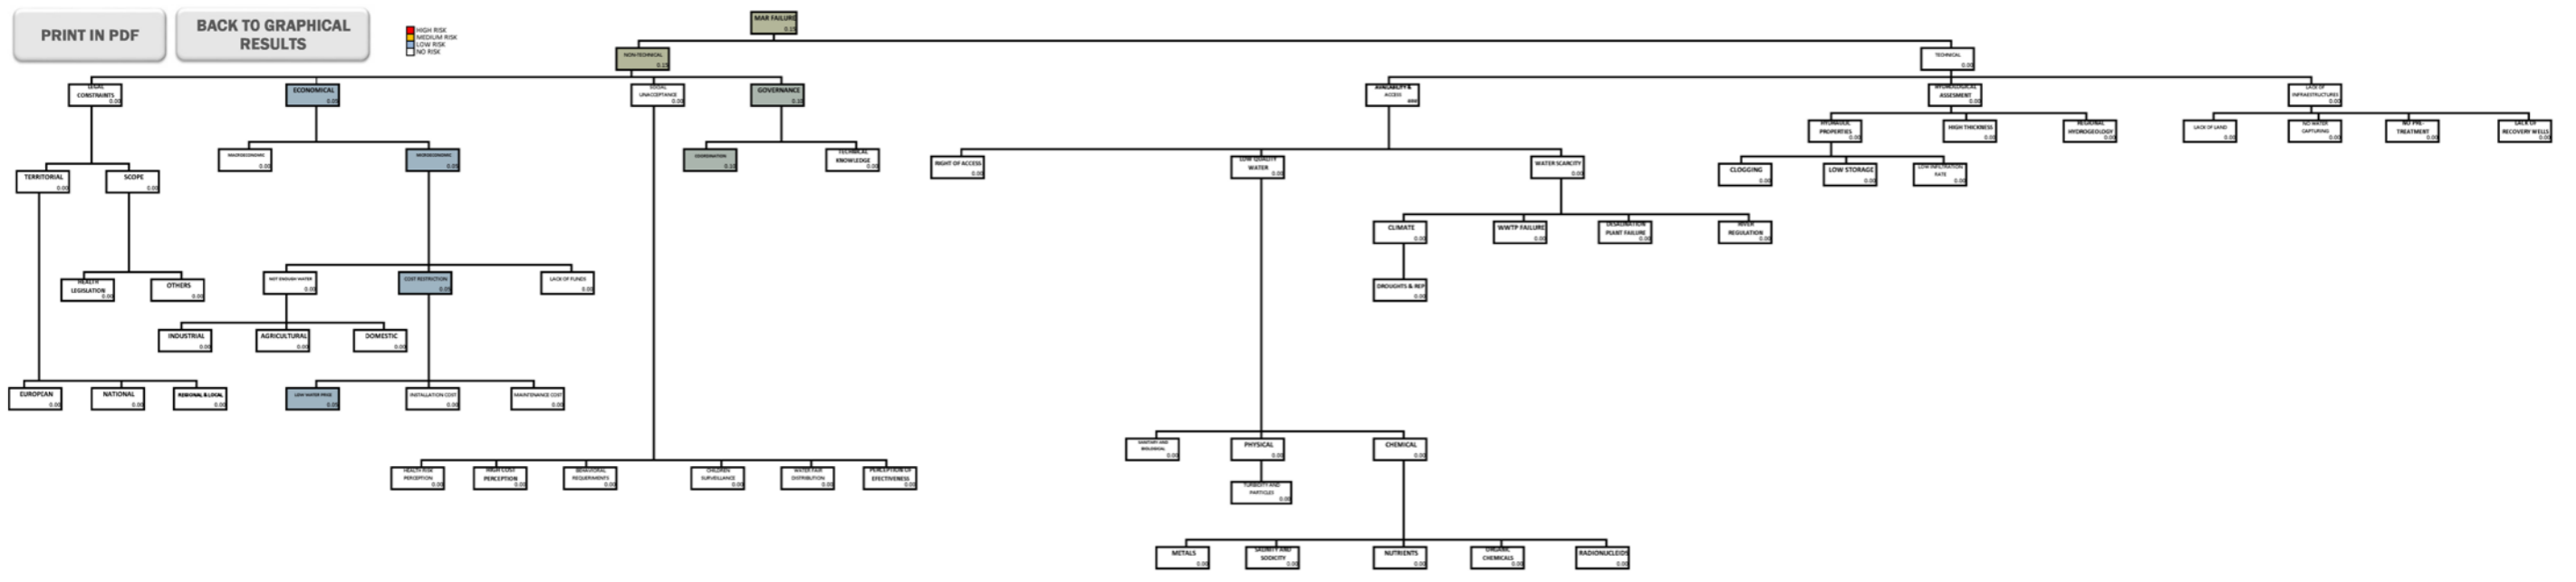

Figure S3.14. Design and construction sheet visualization.
